# Supplementary material for: Sustainable nitrogen fixation with nanosecond pulsed spark discharges: insights into free-radical-chain reactions
Source: Royal Society of Chemistry journal article supplement (doi:10.1039/d1gc03859a), 2022-01-01
Supplement: d1gc03859a1.pdf [file d1gc03859a1.pdf]

**TABLE S1.** The reactions and corresponding rate coefficients in the plasma kinetics

|        | Reactions                              | Reaction coefficients | Reference |
|--------|----------------------------------------|-----------------------|-----------|
| R1-8   | $e+N_2 \rightarrow e+N_2(v_1-v_8)$     | BOLSIG+               | 1         |
| R9-16  | $e+N_2(v_1-v_8) \rightarrow e+N_2$     | BOLSIG+               | 1         |
| R17-20 | $e+O_2 \rightarrow e+O_2(v_1-v_4)$     | BOLSIG+               | 1         |
| R21-24 | $e+O_2(v_1-v_4) \rightarrow e+O_2$     | BOLSIG+               | 1         |
| R25    | $e+NO \rightarrow 2e+NO^+$             | BOLSIG+               | 1         |
| R26    | $e+N_2O \rightarrow 2e+N_2O^+$         | BOLSIG+               | 1         |
| R27    | $e+O_2 \rightarrow O^-+O$              | BOLSIG+               | 1         |
| R28    | $e+O_3 \rightarrow O_2^-+O$            | BOLSIG+               | 1         |
| R29    | $e+NO \rightarrow O^-+N$               | BOLSIG+               | 1         |
| R30    | $e+O_3 \rightarrow O^-+O_2$            | BOLSIG+               | 1         |
| R31    | $e+N_2O \rightarrow NO^-+N$            | BOLSIG+               | 1         |
| R32    | $e+N_2 \rightarrow e+N_2(A3, v_0-v_4)$ | BOLSIG+               | 1         |
| R33    | $e+N_2 \rightarrow e+N_2(A3, v_5-v_8)$ | BOLSIG+               | 1         |
| R34    | $e+N_2 \rightarrow e+N_2(A3, v_{10})$  | BOLSIG+               | 1         |
| R35    | $e+N_2 \rightarrow e+N_2(B3)$          | BOLSIG+               | 1         |
| R36    | $e+N_2 \rightarrow e+N_2(W3)$          | BOLSIG+               | 1         |
| R37    | $e+N_2 \rightarrow e+N_2(B'3)$         | BOLSIG+               | 1         |
| R38    | $e+N_2 \rightarrow e+N_2(A'1)$         | BOLSIG+               | 1         |
| R39    | $e+N_2 \rightarrow e+N_2(A1)$          | BOLSIG+               | 1         |
| R40    | $e+N_2 \rightarrow e+N_2(W1)$          | BOLSIG+               | 1         |
| R41    | $e+N_2 \rightarrow e+N_2(C3)$          | BOLSIG+               | 1         |
| R42    | $e+N_2 \rightarrow e+N_2(e3)$          | BOLSIG+               | 1         |
| R43    | $e+N_2 \rightarrow e+N_2(A''1)$        | BOLSIG+               | 1         |
| R44    | $e+N_2 \rightarrow e+N+N(^2D)$         | BOLSIG+               | 1         |
| R45    | $e+O_2 \rightarrow e+O_2(A1)$          | BOLSIG+               | 1         |
| R46    | $e+O_2 \rightarrow e+O_2(B1)$          | BOLSIG+               | 1         |
| R47    | $e+O_2 \rightarrow e+O_2(4.5eV)$       | BOLSIG+               | 1         |
| R48    | $e+O_2 \rightarrow e+O(^3P)+O(^3P)$    | BOLSIG+               | 1         |
| R49    | $e+O \rightarrow e+O(^1D)$             | BOLSIG+               | 1         |

|     |                                    |                                           |   |
|-----|------------------------------------|-------------------------------------------|---|
| R50 | $e+O \rightarrow e+O(^1S)$         | BOLSIG+                                   | 1 |
| R51 | $e+N_2 \rightarrow 2e+N_2^+$       | BOLSIG+                                   | 1 |
| R52 | $e+O_2 \rightarrow 2e+O_2^+$       | BOLSIG+                                   | 1 |
| R53 | $e+N \rightarrow 2e+N^+$           | BOLSIG+                                   | 1 |
| R54 | $e+O \rightarrow 2e+O^+$           | BOLSIG+                                   | 1 |
| R55 | $e+N_2^+ \rightarrow N+N$          | $0.90 \times 10^{-7} (300.0/T_e)^{0.39}$  | 1 |
| R56 | $e+N_2^+ \rightarrow N+N(^2D)$     | $0.81 \times 10^{-7} (300.0/T_e)^{0.39}$  | 1 |
| R57 | $e+N_2^+ \rightarrow N+N(^2P)$     | $0.90 \times 10^{-8} (300.0/T_e)^{0.39}$  | 1 |
| R58 | $e+O_2^+ \rightarrow O+O$          | $1.49 \times 10^{-7} (300.0/T_e)^{0.7}$   | 1 |
| R59 | $e+O_2^+ \rightarrow O+O(^1D)$     | $1.08 \times 10^{-7} (300.0/T_e)^{0.7}$   | 1 |
| R60 | $e+O_2^+ \rightarrow O+O(^1S)$     | $1.40 \times 10^{-8} (300.0/T_e)^{0.7}$   | 1 |
| R61 | $e+N^++e \rightarrow N+e$          | $7.00 \times 10^{-20} (300.0/T_e)^{4.5}$  | 1 |
| R62 | $e+O^++e \rightarrow O+e$          | $7.00 \times 10^{-20} (300.0/T_e)^{4.5}$  | 1 |
| R63 | $e+N^++M \rightarrow N+M$          | $6.00 \times 10^{-27} (300.0/T_e)^{1.5}$  | 1 |
| R64 | $e+O^++M \rightarrow O+M$          | $6.00 \times 10^{-27} (300.0/T_e)^{1.5}$  | 1 |
| R65 | $N_2(A3) \rightarrow N_2$          | $0.50 \times 10^0$                        | 1 |
| R66 | $N_2(B3) \rightarrow N_2(A3)$      | $1.34 \times 10^5$                        | 1 |
| R67 | $N_2(A'1) \rightarrow N_2$         | $1.00 \times 10^2$                        | 1 |
| R68 | $N_2(C3) \rightarrow N_2(B3)$      | $2.45 \times 10^7$                        | 1 |
| R69 | $O_2(A1) \rightarrow O_2$          | $2.60 \times 10^{-4}$                     | 1 |
| R70 | $O_2(B1) \rightarrow O_2(A1)$      | $1.50 \times 10^{-3}$                     | 1 |
| R71 | $O_2(B1) \rightarrow O_2$          | $8.50 \times 10^{-2}$                     | 1 |
| R72 | $O_2(4.5eV) \rightarrow O_2$       | $1.10 \times 10^1$                        | 1 |
| R73 | $N^++O \rightarrow N+O^+$          | $1.00 \times 10^{-12}$                    | 1 |
| R74 | $N^++O_2 \rightarrow O_2^++N$      | $2.80 \times 10^{-10}$                    | 1 |
| R75 | $N^++O_2 \rightarrow NO^++O$       | $2.50 \times 10^{-10}$                    | 1 |
| R76 | $N^++O_2 \rightarrow O^++NO$       | $2.80 \times 10^{-11}$                    | 1 |
| R77 | $N_2(A3)+O \rightarrow NO+N(^2D)$  | $7.00 \times 10^{-12}$                    | 1 |
| R78 | $N_2(A3)+O \rightarrow N_2+O(^1S)$ | $2.10 \times 10^{-11}$                    | 1 |
| R79 | $N_2(A3)+N \rightarrow N_2+N$      | $2.00 \times 10^{-12}$                    | 1 |
| R80 | $N_2(A3)+N \rightarrow N_2+N(^2P)$ | $4.00 \times 10^{-11} (300.0/T_g)^{0.67}$ | 1 |

|      |                                              |                                          |   |
|------|----------------------------------------------|------------------------------------------|---|
| R81  | $N_2(A3)+O_2 \rightarrow N_2+O(^3P)+O(^1D)$  | $2.10 \times 10^{-12}(T_g/300.0)^{0.55}$ | 1 |
| R82  | $N_2(A3)+O_2 \rightarrow N_2+O_2(A1)$        | $2.00 \times 10^{-13}(T_g/300.0)^{0.55}$ | 1 |
| R83  | $N_2(A3)+O_2 \rightarrow N_2+O_2(B1)$        | $2.00 \times 10^{-13}(T_g/300.0)^{0.55}$ | 1 |
| R84  | $N_2(A3)+N_2 \rightarrow N_2+N_2$            | $3.0 \times 10^{-16}$                    | 1 |
| R85  | $N_2(A3)+NO \rightarrow N_2+NO$              | $6.90 \times 10^{-11}$                   | 1 |
| R86  | $N_2(A3)+N_2(A3) \rightarrow N_2+N_2(B3)$    | $3.00 \times 10^{-10}$                   | 1 |
| R87  | $N_2(A3)+N_2(A3) \rightarrow N_2+N_2(C3)$    | $1.50 \times 10^{-10}$                   | 1 |
| R88  | $N_2(B3)+N_2 \rightarrow N_2(A3)+N_2$        | $3.00 \times 10^{-11}$                   | 1 |
| R89  | $N_2(B3)+N_2 \rightarrow N_2+N_2$            | $2.00 \times 10^{-12}$                   | 1 |
| R90  | $N_2(B3)+O_2 \rightarrow N_2+O(^3P)+O(^3P)$  | $3.00 \times 10^{-10}$                   | 1 |
| R91  | $N_2(B3)+NO \rightarrow N_2(A3)+NO$          | $2.40 \times 10^{-10}$                   | 1 |
| R92  | $N_2(C3)+N_2 \rightarrow N_2(A'1)+N_2$       | $1.00 \times 10^{-11}$                   | 1 |
| R93  | $N_2(C3)+O_2 \rightarrow N_2+O+O(^1S)$       | $3.00 \times 10^{-10}$                   | 1 |
| R94  | $N_2(A'1)+N_2 \rightarrow N_2(B3)+N_2$       | $1.90 \times 10^{-13}$                   | 1 |
| R95  | $N_2(A'1)+O_2 \rightarrow N_2+O(^3P)+O(^3P)$ | $2.80 \times 10^{-11}$                   | 1 |
| R96  | $N_2(A'1)+NO \rightarrow N_2+N+O$            | $3.60 \times 10^{-10}$                   | 1 |
| R97  | $N+N+N_2 \rightarrow N_2(A3)+N_2$            | $1.70 \times 10^{-33}$                   | 1 |
| R98  | $N+N+O_2 \rightarrow N_2(A3)+O_2$            | $1.70 \times 10^{-33}$                   | 1 |
| R99  | $N+N+NO \rightarrow N_2(A3)+NO$              | $1.70 \times 10^{-33}$                   | 1 |
| R100 | $N+N+N \rightarrow N_2(A3)+N$                | $1.00 \times 10^{-32}$                   | 1 |
| R101 | $N+N+O \rightarrow N_2(A3)+O$                | $1.00 \times 10^{-32}$                   | 1 |
| R102 | $N+N+N_2 \rightarrow N_2(B3)+N_2$            | $2.40 \times 10^{-33}$                   | 1 |
| R103 | $N+N+O_2 \rightarrow N_2(B3)+O_2$            | $2.40 \times 10^{-33}$                   | 1 |
| R104 | $N+N+NO \rightarrow N_2(B3)+NO$              | $2.40 \times 10^{-33}$                   | 1 |
| R105 | $N+N+N \rightarrow N_2(B3)+N$                | $1.40 \times 10^{-32}$                   | 1 |
| R106 | $N+N+O \rightarrow N_2(B3)+O$                | $1.40 \times 10^{-32}$                   | 1 |
| R107 | $N(^2D)+O \rightarrow N+O(^1D)$              | $4.00 \times 10^{-13}$                   | 1 |
| R108 | $N(^2D)+O_2 \rightarrow NO+O(^3P)$           | $5.20 \times 10^{-12}$                   | 1 |
| R109 | $N(^2D)+NO \rightarrow N_2+O$                | $1.80 \times 10^{-10}$                   | 1 |
| R110 | $N(^2D)+N_2 \rightarrow N+N_2$               | $1.00 \times 10^{-13} \exp(-510.0/T_g)$  | 1 |
| R111 | $N(^2P)+N \rightarrow N+N$                   | $1.80 \times 10^{-12}$                   | 1 |

|      |                                              |                                                            |   |
|------|----------------------------------------------|------------------------------------------------------------|---|
| R112 | $N(^2P)+O \rightarrow N+O$                   | $1.00 \times 10^{-12}$                                     | 1 |
| R113 | $N(^2P)+N \rightarrow N(^2D)+N$              | $6.00 \times 10^{-13}$                                     | 1 |
| R114 | $N(^2P)+N_2 \rightarrow N+N_2$               | $6.00 \times 10^{-14}$                                     | 1 |
| R115 | $N(^2P)+N(^2D) \rightarrow N_2^++e$          | $1.00 \times 10^{-13}$                                     | 1 |
| R116 | $N(^2P)+O_2 \rightarrow NO+O$                | $2.60 \times 10^{-12}$                                     | 1 |
| R117 | $N(^2P)+NO \rightarrow N_2(A3)+O$            | $3.00 \times 10^{-11}$                                     | 1 |
| R118 | $O_2(A1)+O \rightarrow O_2+O$                | $7.00 \times 10^{-16}$                                     | 1 |
| R119 | $O_2(A1)+N \rightarrow NO+O$                 | $2.00 \times 10^{-14} \exp(-600.0/T_g)$                    | 1 |
| R120 | $O_2(A1)+O_2 \rightarrow O_2+O_2$            | $3.80 \times 10^{-18} \exp(-205.0/T_g)$                    | 1 |
| R121 | $O_2(A1)+N_2 \rightarrow O_2+N_2$            | $3.00 \times 10^{-21}$                                     | 1 |
| R122 | $O_2(A1)+NO \rightarrow O_2+NO$              | $2.50 \times 10^{-11}$                                     | 1 |
| R123 | $O_2(A1)+O_2(A1) \rightarrow O_2+O_2(B1)$    | $7.00 \times 10^{-28} T_g^{3.8} \exp(700.0/T_g)$           | 1 |
| R124 | $O_2(B1)+O \rightarrow O_2(A1)+O$            | $8.10 \times 10^{-14}$                                     | 1 |
| R125 | $O_2(B1)+O \rightarrow O_2+O(^1D)$           | $3.40 \times 10^{-11} (300.0/T_g)^{0.1} \exp(-4200.0/T_g)$ | 1 |
| R126 | $O_2(B1)+O_2 \rightarrow O_2(A1)+O_2$        | $4.30 \times 10^{-22} T_g^{2.4} \exp(-281.0/T_g)$          | 1 |
| R127 | $O_2(B1)+N_2 \rightarrow O_2(A1)+N_2$        | $1.70 \times 10^{-15} (T_g/300.0)$                         | 1 |
| R128 | $O_2(B1)+NO \rightarrow O_2(A1)+NO$          | $6.00 \times 10^{-14}$                                     | 1 |
| R129 | $O_2(4.5eV)+O \rightarrow O_2+O(^1S)$        | $9.00 \times 10^{-12}$                                     | 1 |
| R130 | $O_2(4.5eV)+O_2 \rightarrow O_2(B1)+O_2(B1)$ | $3.00 \times 10^{-13}$                                     | 1 |
| R131 | $O_2(4.5eV)+N_2 \rightarrow O_2(B1)+N_2$     | $9.00 \times 10^{-15}$                                     | 1 |
| R132 | $O(^1D)+O \rightarrow O+O$                   | $8.00 \times 10^{-12}$                                     | 1 |
| R133 | $O(^1D)+O_2 \rightarrow O+O_2$               | $6.40 \times 10^{-12} \exp(67.0/T_g)$                      | 1 |
| R134 | $O(^1D)+O_2 \rightarrow O+O_2(A1)$           | $1.00 \times 10^{-12}$                                     | 1 |
| R135 | $O(^1D)+O_2 \rightarrow O+O_2(B1)$           | $2.60 \times 10^{-11} \exp(67.0/T_g)$                      | 1 |
| R136 | $O(^1D)+N_2 \rightarrow O(^3P)+N_2$          | $2.30 \times 10^{-11}$                                     | 1 |
| R137 | $O(^1D)+NO \rightarrow O_2+N$                | $1.70 \times 10^{-10}$                                     | 1 |
| R138 | $O(^1S)+O \rightarrow O(^1D)+O$              | $5.00 \times 10^{-11} \exp(-300.0/T_g)$                    | 1 |
| R139 | $O(^1S)+N \rightarrow O+N$                   | $1.00 \times 10^{-12}$                                     | 1 |
| R140 | $O(^1S)+O_2 \rightarrow O(^1D)+O_2$          | $1.30 \times 10^{-12} \exp(-850.0/T_g)$                    | 1 |
| R141 | $O(^1S)+O_2 \rightarrow O+O+O$               | $3.00 \times 10^{-12} \exp(-850.0/T_g)$                    | 1 |
| R142 | $O(^1S)+N_2 \rightarrow O+N_2$               | $1.00 \times 10^{-17}$                                     | 1 |

|      |                                            |                                                          |   |
|------|--------------------------------------------|----------------------------------------------------------|---|
| R143 | $O(^1S)+O_2(A1)\rightarrow O+O_2(4.5eV)$   | $1.10\times 10^{-10}$                                    | 1 |
| R144 | $O(^1S)+O_2(A1)\rightarrow O(^1D)+O_2(B1)$ | $2.90\times 10^{-11}$                                    | 1 |
| R145 | $O(^1S)+O_2(A1)\rightarrow O+O+O$          | $3.20\times 10^{-11}$                                    | 1 |
| R146 | $O(^1S)+NO\rightarrow O+NO$                | $2.90\times 10^{-10}$                                    | 1 |
| R147 | $O(^1S)+NO\rightarrow O(^1D)+NO$           | $5.10\times 10^{-10}$                                    | 1 |
| R148 | $N+NO\rightarrow O+N_2$                    | $1.80\times 10^{-11}(T_g/300.0)^{0.5}$                   | 1 |
| R149 | $N(^4S)+O_2\rightarrow O(^3P)+NO$          | $3.20\times 10^{-12}(T_g/300.0)\exp(-3150.0/T_g)$        | 1 |
| R150 | $O+N_2\rightarrow N+NO$                    | $3.00\times 10^{-10}\exp(-38370.0/T_g)$                  | 1 |
| R151 | $O+NO\rightarrow N+O_2$                    | $7.50\times 10^{-12}(T_g/300.0)\exp(-19500.0/T_g)$       | 1 |
| R152 | $O(^3P)+NO\rightarrow NO_2$                | $3.02\times 10^{-11}\exp(T_g/298)^{-0.75}$               | 1 |
| R153 | $N_2+O_2\rightarrow O+N_2O$                | $2.50\times 10^{-10}\exp(-50390.0/T_g)$                  | 1 |
| R154 | $NO+NO\rightarrow N+NO_2$                  | $3.30\times 10^{-16}(300.0/T_g)^{0.5}\exp(-39200.0/T_g)$ | 1 |
| R155 | $NO+NO\rightarrow O+N_2O$                  | $2.20\times 10^{-12}\exp(-32100.0/T_g)$                  | 1 |
| R156 | $NO+NO\rightarrow N_2+O_2$                 | $5.10\times 10^{-13}\exp(-33660.0/T_g)$                  | 1 |
| R157 | $NO+O_2\rightarrow O+NO_2$                 | $2.80\times 10^{-12}\exp(-23400.0/T_g)$                  | 1 |
| R158 | $NO+N_2O\rightarrow N_2+NO_2$              | $4.60\times 10^{-10}\exp(-25170.0/T_g)$                  | 1 |
| R159 | $NO+NO_3\rightarrow NO_2+NO_2$             | $1.70\times 10^{-11}$                                    | 1 |
| R160 | $O_2+O_2\rightarrow O+O_3$                 | $2.00\times 10^{-11}\exp(-49800.0/T_g)$                  | 1 |
| R161 | $O_2+NO_2\rightarrow NO+O_3$               | $2.80\times 10^{-12}\exp(-25400.0/T_g)$                  | 1 |
| R162 | $NO_2+NO_2\rightarrow NO+NO+O_2$           | $3.30\times 10^{-12}\exp(-13500.0/T_g)$                  | 1 |
| R163 | $NO_2+NO_2\rightarrow NO+NO_3$             | $4.50\times 10^{-10}\exp(-18500.0/T_g)$                  | 1 |
| R164 | $NO_2+O_3\rightarrow O_2+NO_3$             | $1.20\times 10^{-13}\exp(-2450.0/T_g)$                   | 1 |
| R165 | $NO_2+NO_3\rightarrow NO+NO_2+O_2$         | $2.30\times 10^{-13}\exp(-1600.0/T_g)$                   | 1 |
| R166 | $NO_3+O_2\rightarrow NO_2+O_3$             | $1.50\times 10^{-12}\exp(-15020.0/T_g)$                  | 1 |
| R167 | $NO_3+NO_3\rightarrow O_2+NO_2+NO_2$       | $4.30\times 10^{-12}\exp(-3850.0/T_g)$                   | 1 |
| R168 | $N+NO_2\rightarrow O+O+N_2$                | $9.10\times 10^{-13}$                                    | 1 |
| R169 | $N+NO_2\rightarrow O+N_2O$                 | $3.00\times 10^{-12}$                                    | 1 |
| R170 | $N+NO_2\rightarrow N_2+O_2$                | $7.00\times 10^{-13}$                                    | 1 |
| R171 | $N+NO_2\rightarrow NO+NO$                  | $2.30\times 10^{-12}$                                    | 1 |
| R172 | $NO+O_3\rightarrow O_2+NO_2$               | $2.50\times 10^{-13}\exp(-765.0/T_g)$                    | 1 |
| R173 | $O+N_2O\rightarrow N_2+O_2$                | $8.30\times 10^{-12}\exp(-14000.0/T_g)$                  | 1 |

|      |                                          |                                                                     |   |
|------|------------------------------------------|---------------------------------------------------------------------|---|
| R174 | $O+N_2O \rightarrow NO+NO$               | $1.50 \times 10^{-10} \exp(-14090.0/T_g)$                           | 1 |
| R175 | $O+NO_2 \rightarrow NO+O_2$              | $9.10 \times 10^{-12} (T_g/300.0)^{0.18}$                           | 1 |
| R176 | $O+NO_3 \rightarrow O_2+NO_2$            | $1.00 \times 10^{-11}$                                              | 1 |
| R177 | $O_2(A1)+O_3 \rightarrow O_2+O_2+O(^1D)$ | $5.20 \times 10^{-11} \exp(-2840.0/T_g)$                            | 1 |
| R178 | $O+O_3 \rightarrow O_2+O_2(A1)$          | $1.00 \times 10^{-11} \exp(-2300.0/T_g)$                            | 1 |
| R179 | $O_2(B1)+O_3 \rightarrow O_2+O_2+O$      | $2.20 \times 10^{-11}$                                              | 1 |
| R180 | $O(^1D)+O_3 \rightarrow O_2+O+O$         | $1.20 \times 10^{-10}$                                              | 1 |
| R181 | $O(^1D)+O_3 \rightarrow O_2+O_2$         | $1.20 \times 10^{-10}$                                              | 1 |
| R182 | $O(^1D)+N_2O \rightarrow NO+NO$          | $7.20 \times 10^{-11}$                                              | 1 |
| R183 | $O(^1D)+N_2O \rightarrow O_2+N_2$        | $4.40 \times 10^{-11}$                                              | 1 |
| R184 | $O(^1S)+O_3 \rightarrow O_2+O_2$         | $2.90 \times 10^{-10}$                                              | 1 |
| R185 | $O(^1S)+O_3 \rightarrow O_2+O+O(^1D)$    | $2.90 \times 10^{-10}$                                              | 1 |
| R186 | $O(^1S)+N_2O \rightarrow O+N_2O$         | $6.30 \times 10^{-12}$                                              | 1 |
| R187 | $O(^1S)+N_2O \rightarrow O(^1D)+N_2O$    | $3.10 \times 10^{-12}$                                              | 1 |
| R188 | $N_2(A3)+O_2 \rightarrow N_2O+O$         | $2.00 \times 10^{-14} (T_g/300.0)^{0.55}$                           | 1 |
| R189 | $N_2+N_2 \rightarrow N+N+N_2$            | $5.40 \times 10^{-8} (1.0 - \exp(-3354.0/T_g)) \exp(-113200.0/T_g)$ | 1 |
| R190 | $N_2+O_2 \rightarrow N+N+O_2$            | $5.40 \times 10^{-8} (1.0 - \exp(-3354.0/T_g)) \exp(-113200.0/T_g)$ | 1 |
| R191 | $N_2+NO \rightarrow N+N+NO$              | $5.40 \times 10^{-8} (1.0 - \exp(-3354.0/T_g)) \exp(-113200.0/T_g)$ | 1 |
| R192 | $N_2+O \rightarrow N+N+O$                | $3.56 \times 10^{-7} (1.0 - \exp(-3354.0/T_g)) \exp(-113200.0/T_g)$ | 1 |
| R193 | $N_2+N \rightarrow N+N+N$                | $3.56 \times 10^{-7} (1.0 - \exp(-3354.0/T_g)) \exp(-113200.0/T_g)$ | 1 |
| R194 | $O_2+N_2 \rightarrow O+O+N_2$            | $6.10 \times 10^{-9} (1.0 - \exp(-2240.0/T_g)) \exp(-59380.0/T_g)$  | 1 |
| R195 | $O_2+O_2 \rightarrow O+O+O_2$            | $3.60 \times 10^{-8} (1.0 - \exp(-2240.0/T_g)) \exp(-59380.0/T_g)$  | 1 |
| R196 | $O_2+O \rightarrow O+O+O$                | $6.10 \times 10^{-9} (1.0 - \exp(-2240.0/T_g)) \exp(-59380.0/T_g)$  | 1 |
| R197 | $O_2+N \rightarrow O+O+N$                | $6.10 \times 10^{-9} (1.0 - \exp(-2240.0/T_g)) \exp(-59380.0/T_g)$  | 1 |
| R198 | $O_2+NO \rightarrow O+O+NO$              | $6.10 \times 10^9 (1.0 - \exp(2240.0/T_g)) \exp(-59380.0/T_g)$      | 1 |
| R199 | $NO+N_2 \rightarrow N+O+N_2$             | $8.70 \times 10^{-9} \exp(-75994.0/T_g)$                            | 1 |
| R200 | $NO+O_2 \rightarrow N+O+O_2$             | $8.70 \times 10^{-9} \exp(-75994.0/T_g)$                            | 1 |
| R201 | $NO+O \rightarrow N+O+O$                 | $1.74 \times 10^{-7} \exp(-75994.0/T_g)$                            | 1 |
| R202 | $NO+N \rightarrow N+O+N$                 | $1.74 \times 10^{-7} \exp(-75994.0/T_g)$                            | 1 |
| R203 | $NO+NO \rightarrow N+O+NO$               | $1.74 \times 10^{-7} \exp(-75994.0/T_g)$                            | 1 |

|      |                                    |                                                                                     |   |
|------|------------------------------------|-------------------------------------------------------------------------------------|---|
| R204 | $O_3+N_2 \rightarrow O_2+O+N_2$    | $6.60 \times 10^{-10} \exp(-11600.0/T_g)$                                           | 1 |
| R205 | $O_3+O_2 \rightarrow O_2+O+O_2$    | $2.51 \times 10^{-10} \exp(-11600.0/T_g)$                                           | 1 |
| R206 | $O_3+N \rightarrow O_2+O+N$        | $4.16 \times 10^{-9} \exp(-11600.0/T_g) \exp(170.0/T_g)$                            | 1 |
| R207 | $O_3+O \rightarrow O_2+O+O$        | $4.16 \times 10^{-9} \exp(-11600.0/T_g) \exp(170.0/T_g)$                            | 1 |
| R208 | $N_2O+N_2 \rightarrow N_2+O+N_2$   | $1.20 \times 10^{-8} (300.0/T_g) \exp(-29000.0/T_g)$                                | 1 |
| R209 | $N_2O+O_2 \rightarrow N_2+O+O_2$   | $1.20 \times 10^{-8} (300.0/T_g) \exp(-29000.0/T_g)$                                | 1 |
| R210 | $N_2O+NO \rightarrow N_2+O+NO$     | $2.40 \times 10^{-8} (300.0/T_g) \exp(-29000.0/T_g)$                                | 1 |
| R211 | $N_2O+N_2O \rightarrow N_2+O+N_2O$ | $4.8 \times 10^{-8} (300.0/T_g) \exp(-29000.0/T_g)$                                 | 1 |
| R214 | $NO_2+NO \rightarrow NO+O+NO$      | $5.30 \times 10^{-5} (300.0/T_g)^2 \exp(-36180.0/T_g)$                              | 1 |
| R215 | $NO_2+NO_2 \rightarrow NO+O+NO_2$  | $4.01 \times 10^{-5} (300.0/T_g)^2 \exp(-36180.0/T_g)$                              | 1 |
| R216 | $NO_3+N_2 \rightarrow NO_2+O+N_2$  | $3.10 \times 10^{-5} (300.0/T_g)^2 \exp(-25000.0/T_g)$                              | 1 |
| R217 | $NO_3+O_2 \rightarrow NO_2+O+O_2$  | $3.10 \times 10^{-5} (300.0/T_g)^2 \exp(-25000.0/T_g)$                              | 1 |
| R218 | $NO_3+NO \rightarrow NO_2+O+NO$    | $3.10 \times 10^{-5} (300.0/T_g)^2 \exp(-25000.0/T_g)$                              | 1 |
| R219 | $NO_3+N \rightarrow NO_2+O+N$      | $3.10 \times 10^{-5} (300.0/T_g)^2 \exp(-25000.0/T_g)$                              | 1 |
| R220 | $NO_3+O \rightarrow NO_2+O+O$      | $3.10 \times 10^{-5} (300.0/T_g)^2 \exp(-25000.0/T_g)$                              | 1 |
| R221 | $NO_3+N_2 \rightarrow NO+O_2+N_2$  | $6.20 \times 10^{-5} (300.0/T_g)^2 \exp(-25000.0/T_g)$                              | 1 |
| R222 | $NO_3+O_2 \rightarrow NO+O_2+O_2$  | $6.20 \times 10^{-5} (300.0/T_g)^2 \exp(-25000.0/T_g)$                              | 1 |
| R223 | $NO_3+NO \rightarrow NO+O_2+NO$    | $6.20 \times 10^{-5} (300.0/T_g)^2 \exp(-25000.0/T_g)$                              | 1 |
| R224 | $NO_3+N \rightarrow NO+O_2+N$      | $7.44 \times 10^{-4} (300.0/T_g)^2 \exp(-25000.0/T_g)$                              | 1 |
| R225 | $NO_3+O \rightarrow NO+O_2+O$      | $7.44 \times 10^{-4} (300.0/T_g)^2 \exp(-25000.0/T_g)$                              | 1 |
| R226 | $N_2O_5+M \rightarrow NO_2+NO_3+M$ | $2.10 \times 10^{-11} (300.0/T_g)^{4.4} \exp(-11080.0/T_g)$                         | 1 |
| R227 | $N+N+N_2 \rightarrow N_2+N_2$      | $\max(8.30 \times 10^{-34} \exp(500.0/T_g), 1.91 \times 10^{-33})$                  | 1 |
| R228 | $N+N+O_2 \rightarrow N_2+O_2$      | $1.80 \times 10^{-33} \exp(435.0/T_g)$                                              | 1 |
| R229 | $N+N+NO \rightarrow N_2+NO$        | $1.80 \times 10^{-33} \exp(435.0/T_g)$                                              | 1 |
| R230 | $N+N+N \rightarrow N_2+N$          | $5.40 \times 10^{-33} \exp(435.0/T_g)$                                              | 1 |
| R231 | $N+N+O \rightarrow N_2+O$          | $5.40 \times 10^{-33} \exp(435.0/T_g)$                                              | 1 |
| R232 | $O+O+N_2 \rightarrow O_2+N_2$      | $\max(2.8 \times 10^{-34} \exp(720.0/T_g), 1.0 \times 10^{-33} (300.0/T_g)^{0.41})$ | 1 |
| R233 | $O+O+O_2 \rightarrow O_2+O_2$      | $4.00 \times 10^{-33} (300.0/T_g)^{0.41}$                                           | 1 |
| R234 | $O+O+N \rightarrow O_2+N$          | $3.20 \times 10^{-33} (300.0/T_g)^{0.41}$                                           | 1 |
| R235 | $O+O+O \rightarrow O_2+O$          | $1.44 \times 10^{-32} (300.0/T_g)^{0.41}$                                           | 1 |
| R236 | $O+O+NO \rightarrow O_2+NO$        | $0.68 \times 10^{-33} (300.0/T_g)^{0.41}$                                           | 1 |

|      |                                    |                                                                                       |   |
|------|------------------------------------|---------------------------------------------------------------------------------------|---|
| R237 | $N+O+N_2 \rightarrow NO+N_2$       | $1.00 \times 10^{-32} (300.0/T_g)^{0.5}$                                              | 1 |
| R238 | $N+O+O_2 \rightarrow NO+O_2$       | $1.00 \times 10^{-32} (300.0/T_g)^{0.5}$                                              | 1 |
| R239 | $N+O+N \rightarrow NO+N$           | $1.80 \times 10^{-31} (300.0/T_g)$                                                    | 1 |
| R240 | $N+O+O \rightarrow NO+O$           | $1.80 \times 10^{-31} (300.0/T_g)$                                                    | 1 |
| R241 | $N+O+NO \rightarrow NO+NO$         | $1.80 \times 10^{-31} (300.0/T_g)$                                                    | 1 |
| R242 | $O+O_2+N_2 \rightarrow O_3+N_2$    | $\max(5.00 \times 10^{-34} (300.0/T_g)^{2.8}, 5.4 \times 10^{-34} (300.0/T_g)^{1.9})$ | 1 |
| R243 | $O+O_2+O_2 \rightarrow O_3+O_2$    | $7.6 \times 10^{-34} (300.0/T_g)^{1.9}$                                               | 1 |
| R244 | $O+O_2+NO \rightarrow O_3+NO$      | $7.6 \times 10^{-34} (300.0/T_g)^{1.9}$                                               | 1 |
| R245 | $O+O_2+N \rightarrow O_3+N$        | $\min(3.90 \times 10^{-33} (300.0/T_g)^{1.9}, 1.10 \times 10^{-34} \exp(1060.0/T_g))$ | 1 |
| R246 | $O+O_2+O \rightarrow O_3+O$        | $\min(3.90 \times 10^{-33} (300.0/T_g)^{1.9}, 1.10 \times 10^{-34} \exp(1060.0/T_g))$ | 1 |
| R247 | $O+N_2+M \rightarrow N_2O+M$       | $3.90 \times 10^{-35} \exp(-10400.0/T_g)$                                             | 1 |
| R248 | $O+NO+N_2 \rightarrow NO_2+N_2$    | $1.20 \times 10^{-31} (300.0/T_g)^{1.8}$                                              | 1 |
| R249 | $O+NO+O_2 \rightarrow NO_2+O_2$    | $0.64 \times 10^{-31} (300.0/T_g)^{1.8}$                                              | 1 |
| R250 | $O+NO+NO \rightarrow NO_2+NO$      | $0.64 \times 10^{-31} (300.0/T_g)^{1.8}$                                              | 1 |
| R251 | $O+NO_2+N_2 \rightarrow NO_3+N_2$  | $8.90 \times 10^{-32} (300.0/T_g)^2$                                                  | 1 |
| R252 | $O+NO_2+O_2 \rightarrow NO_3+O_2$  | $8.90 \times 10^{-32} (300.0/T_g)^2$                                                  | 1 |
| R253 | $O+NO_2+N \rightarrow NO_3+N$      | $1.15 \times 10^{-30} (300.0/T_g)^2$                                                  | 1 |
| R254 | $O+NO_2+O \rightarrow NO_3+O$      | $1.15 \times 10^{-30} (300.0/T_g)^2$                                                  | 1 |
| R255 | $O+NO_2+NO \rightarrow NO_3+NO$    | $2.14 \times 10^{-31} (300.0/T_g)^2$                                                  | 1 |
| R256 | $NO_2+NO_3+M \rightarrow N_2O_5+M$ | $3.70 \times 10^{-30} (300.0/T_g)^{4.1}$                                              | 1 |
| R257 | $e+NO^+ \rightarrow O+N$           | $0.84 \times 10^{-7} (300.0/T_e)^{0.85}$                                              | 1 |
| R258 | $e+NO^+ \rightarrow O+N(^2D)$      | $3.36 \times 10^{-7} (300.0/T_e)^{0.85}$                                              | 1 |
| R259 | $e+N_2O^+ \rightarrow N_2+O$       | $2.00 \times 10^{-7} (300.0/T_e)^{0.5}$                                               | 1 |
| R260 | $e+NO_2 \rightarrow O+NO$          | $1.00 \times 10^{-11}$                                                                | 1 |
| R261 | $O^++O \rightarrow O_2+e$          | $1.40 \times 10^{-10}$                                                                | 1 |
| R262 | $O^++N \rightarrow NO+e$           | $2.60 \times 10^{-10}$                                                                | 1 |
| R263 | $O^++NO \rightarrow NO_2+e$        | $2.60 \times 10^{-10}$                                                                | 1 |
| R264 | $O^++N_2 \rightarrow N_2O+e$       | $5.00 \times 10^{-13}$                                                                | 1 |
| R265 | $O^++O_2 \rightarrow O_3+e$        | $5.00 \times 10^{-15}$                                                                | 1 |
| R266 | $O^++O_2(A1) \rightarrow O_3+e$    | $3.00 \times 10^{-10}$                                                                | 1 |
| R267 | $O^++O_2(B1) \rightarrow O+O_2+e$  | $6.90 \times 10^{-10}$                                                                | 1 |



|      |                                             |                                                                        |   |
|------|---------------------------------------------|------------------------------------------------------------------------|---|
| R268 | $O^- + N_2(A3) \rightarrow O + N_2 + e$     | $2.20 \times 10^{-9}$                                                  | 1 |
| R269 | $O^- + N_2(B3) \rightarrow O + N_2 + e$     | $1.90 \times 10^{-9}$                                                  | 1 |
| R270 | $O^- + O_3 \rightarrow O_2 + O_2 + e$       | $3.00 \times 10^{-10}$                                                 | 1 |
| R271 | $O_2^- + N \rightarrow NO_2 + e$            | $5.00 \times 10^{-10}$                                                 | 1 |
| R272 | $O_2^- + O_2 \rightarrow O_2 + O_2 + e$     | $2.70 \times 10^{-10} (T_{eFFN2}/300.0)^{0.5} \exp(-5590.0/T_{eFFN2})$ | 1 |
| R273 | $O_2^- + O_2(A1) \rightarrow O_2 + O_2 + e$ | $2.00 \times 10^{-10}$                                                 | 1 |
| R274 | $O_2^- + O_2(B1) \rightarrow O_2 + O_2 + e$ | $3.60 \times 10^{-10}$                                                 | 1 |
| R275 | $O_2^- + N_2 \rightarrow O_2 + N_2 + e$     | $1.90 \times 10^{-12} (T_{eFFN2}/300.0)^{0.5} \exp(-4990.0/T_{eFFN2})$ | 1 |
| R276 | $O_2^- + N_2(A3) \rightarrow O_2 + N_2 + e$ | $2.10 \times 10^{-9}$                                                  | 1 |
| R277 | $O_2^- + N_2(B3) \rightarrow O_2 + N_2 + e$ | $2.50 \times 10^{-9}$                                                  | 1 |
| R278 | $N^+ + O_3 \rightarrow NO^+ + O_2$          | $5.00 \times 10^{-10}$                                                 | 1 |
| R279 | $N^+ + NO \rightarrow NO^+ + N$             | $8.00 \times 10^{-10}$                                                 | 1 |
| R280 | $N^+ + NO \rightarrow N_2^+ + O$            | $3.00 \times 10^{-12}$                                                 | 1 |
| R281 | $N^+ + NO \rightarrow O^+ + N_2$            | $1.00 \times 10^{-12}$                                                 | 1 |
| R282 | $N^+ + N_2O \rightarrow NO^+ + N_2$         | $5.50 \times 10^{-10}$                                                 | 1 |
| R283 | $O^+ + O_3 \rightarrow O_2^+ + O_2$         | $1.00 \times 10^{-10}$                                                 | 1 |
| R284 | $O^+ + NO \rightarrow NO^+ + O$             | $2.40 \times 10^{-11}$                                                 | 1 |
| R285 | $O^+ + NO \rightarrow O_2^+ + N$            | $3.00 \times 10^{-12}$                                                 | 1 |
| R286 | $O^+ + N(^2D) \rightarrow N^+ + O$          | $1.30 \times 10^{-10}$                                                 | 1 |
| R287 | $O^+ + N_2O \rightarrow NO^+ + NO$          | $2.30 \times 10^{-10}$                                                 | 1 |
| R288 | $O^+ + N_2O \rightarrow N_2O^+ + O$         | $2.20 \times 10^{-10}$                                                 | 1 |
| R289 | $O^+ + N_2O \rightarrow O_2^+ + N_2$        | $2.00 \times 10^{-11}$                                                 | 1 |
| R290 | $O^+ + NO_2 \rightarrow NO_2^+ + O$         | $1.60 \times 10^{-9}$                                                  | 1 |
| R291 | $N_2^+ + O_3 \rightarrow O_2^+ + O + N_2$   | $1.00 \times 10^{-10}$                                                 | 1 |
| R292 | $N_2^+ + NO \rightarrow NO^+ + N_2$         | $3.30 \times 10^{-10}$                                                 | 1 |
| R293 | $N_2^+ + N_2O \rightarrow N_2O^+ + N_2$     | $5.00 \times 10^{-10}$                                                 | 1 |
| R294 | $N_2^+ + N_2O \rightarrow NO^+ + N + N_2$   | $4.00 \times 10^{-10}$                                                 | 1 |
| R295 | $O_2^+ + NO \rightarrow NO^+ + O_2$         | $6.30 \times 10^{-10}$                                                 | 1 |
| R296 | $O_2^+ + NO_2 \rightarrow NO^+ + O_3$       | $1.00 \times 10^{-11}$                                                 | 1 |
| R297 | $O_2^+ + NO_2 \rightarrow NO_2^+ + O_2$     | $6.60 \times 10^{-10}$                                                 | 1 |
| R298 | $NO_2^+ + NO \rightarrow NO^+ + NO_2$       | $2.90 \times 10^{-10}$                                                 | 1 |

|      |                                                 |                                                                                  |   |
|------|-------------------------------------------------|----------------------------------------------------------------------------------|---|
| R299 | $N_2O^+ + NO \rightarrow NO^+ + N_2O$           | $2.90 \times 10^{-10}$                                                           | 1 |
| R300 | $N + N \rightarrow N_2^+ + e$                   | $2.70 \times 10^{-11} \exp(-6.74 \times 10^4 / T_g)$                             | 1 |
| R301 | $N + O \rightarrow NO^+ + e$                    | $1.60 \times 10^{-12} (T_g / 300.0)^{0.5} (0.19 + 8.6 T_g) \exp(-32000.0 / T_g)$ | 1 |
| R302 | $N_2^+ + N + N_2 \rightarrow N_3^+ + N_2$       | $9.00 \times 10^{-30} \exp(400.0 / T_{eFFN2})$                                   | 1 |
| R303 | $N^+ + N_2 + N_2 \rightarrow N_3^+ + N_2$       | $1.70 \times 10^{-29} (300.0 / T_{eFFN2})^{2.1}$                                 | 1 |
| R304 | $e + N_3^+ \rightarrow N_2 + N$                 | $2.00 \times 10^{-7} (300.0 / T_e)^{0.5}$                                        | 1 |
| R305 | $N_3^+ + O_2 \rightarrow O_2^+ + N + N_2$       | $2.30 \times 10^{-11}$                                                           | 1 |
| R306 | $N_3^+ + O_2 \rightarrow NO_2^+ + N_2$          | $4.40 \times 10^{-11}$                                                           | 1 |
| R307 | $N_3^+ + N \rightarrow N_2^+ + N_2$             | $6.60 \times 10^{-11}$                                                           | 1 |
| R308 | $N_3^+ + NO \rightarrow NO^+ + N + N_2$         | $7.00 \times 10^{-11}$                                                           | 1 |
| R309 | $N_3^+ + NO \rightarrow N_2O^+ + N_2$           | $7.00 \times 10^{-11}$                                                           | 1 |
| R310 | $N_2^+ + N_2 + N_2 \rightarrow N_4^+ + N_2$     | $5.20 \times 10^{-29} (300.0 / T_{eFFN2})^{2.2}$                                 | 1 |
| R311 | $e + N_4^+ \rightarrow N_2 + N_2$               | $2.30 \times 10^{-6} (300.0 / T_e)^{0.53}$                                       | 1 |
| R312 | $N_4^+ + N_2 \rightarrow N_2^+ + N_2 + N_2$     | $\min(2.10 \times 10^{-16} \exp(T_{eFFN4} / 121.0), 1.00 \times 10^{-10})$       | 1 |
| R313 | $N_4^+ + O_2 \rightarrow O_2^+ + N_2 + N_2$     | $2.50 \times 10^{-10}$                                                           | 1 |
| R314 | $N_4^+ + O \rightarrow O^+ + N_2 + N_2$         | $2.50 \times 10^{-10}$                                                           | 1 |
| R315 | $N_4^+ + N \rightarrow N^+ + N_2 + N_2$         | $1.00 \times 10^{-11}$                                                           | 1 |
| R316 | $N_4^+ + NO \rightarrow NO^+ + N_2 + N_2$       | $4.00 \times 10^{-10}$                                                           | 1 |
| R317 | $e + O_4^+ \rightarrow O_2 + O_2$               | $1.40 \times 10^{-6} (300.0 / T_e)^{0.5}$                                        | 1 |
| R318 | $O_2^+ + O_2 + O_2 \rightarrow O_4^+ + O_2$     | $2.40 \times 10^{-30} (300.0 / T_{eFFN2})^{3.2}$                                 | 1 |
| R319 | $O_4^+ + O \rightarrow O_2^+ + O_3$             | $3.00 \times 10^{-10}$                                                           | 1 |
| R320 | $e + O_2^+ N_2 \rightarrow O_2 + N_2$           | $1.30 \times 10^{-6} (300.0 / T_e)^{0.5}$                                        | 1 |
| R321 | $O_2^+ + N_2 + N_2 \rightarrow O_2^+ N_2 + N_2$ | $9.00 \times 10^{-31} (300.0 / T_{eFFN2})^2$                                     | 1 |
| R322 | $O_2^+ N_2 + N_2 \rightarrow O_2^+ + N_2 + N_2$ | $1.10 \times 10^{-6} (300.0 / T_{eFFN4})^{5.3} \exp(-2360.0 / T_{eFFN4})$        | 1 |
| R323 | $O_2^+ N_2 + O_2 \rightarrow O_4^+ + N_2$       | $1.00 \times 10^{-9}$                                                            | 1 |
| R324 | $O^- + NO_2 \rightarrow NO_2^- + O$             | $1.20 \times 10^{-9}$                                                            | 1 |
| R325 | $O^- + N_2O \rightarrow NO^- + NO$              | $2.00 \times 10^{-10}$                                                           | 1 |
| R326 | $O_2^- + NO_2 \rightarrow NO_2^- + O_2$         | $7.00 \times 10^{-10}$                                                           | 1 |
| R327 | $O_2^- + NO_3 \rightarrow NO_3^- + O_2$         | $5.00 \times 10^{-10}$                                                           | 1 |
| R328 | $O^- + N_2O \rightarrow N_2O^- + O$             | $2.00 \times 10^{-12}$                                                           | 1 |
| R329 | $NO^- + NO_2 \rightarrow NO_2^- + NO$           | $7.40 \times 10^{-10}$                                                           | 1 |

|      |                                                                                              |                                                     |   |
|------|----------------------------------------------------------------------------------------------|-----------------------------------------------------|---|
| R330 | $\text{NO}^- + \text{N}_2\text{O} \rightarrow \text{NO}_2^- + \text{N}_2$                    | $2.80 \times 10^{-14}$                              | 1 |
| R331 | $\text{NO}_2^- + \text{O}_3 \rightarrow \text{NO}_3^- + \text{O}_2$                          | $1.80 \times 10^{-11}$                              | 1 |
| R332 | $\text{NO}_2^- + \text{NO}_2 \rightarrow \text{NO}_3^- + \text{NO}$                          | $4.00 \times 10^{-12}$                              | 1 |
| R333 | $\text{NO}_2^- + \text{NO}_3 \rightarrow \text{NO}_3^- + \text{NO}_2$                        | $5.00 \times 10^{-10}$                              | 1 |
| R334 | $\text{NO}_2^- + \text{N}_2\text{O}_5 \rightarrow \text{NO}_3^- + \text{NO}_2 + \text{NO}_2$ | $7.00 \times 10^{-10}$                              | 1 |
| R335 | $\text{NO}_3^- + \text{NO} \rightarrow \text{NO}_2^- + \text{NO}_2$                          | $3.00 \times 10^{-15}$                              | 1 |
| R336 | $\text{N}_2(\text{A}3) + \text{N}_2\text{O} \rightarrow \text{N}_2 + \text{N} + \text{NO}$   | $1.00 \times 10^{-11}$                              | 1 |
| R337 | $\text{N}_2(\text{A}3) + \text{NO}_2 \rightarrow \text{N}_2 + \text{O} + \text{NO}$          | $1.00 \times 10^{-12}$                              | 1 |
| R338 | $\text{N}_2(\text{A}^1) + \text{N}_2(\text{A}3) \rightarrow \text{N}_4^+ + \text{e}$         | $4.00 \times 10^{-12}$                              | 1 |
| R339 | $\text{N}_2(\text{A}^1) + \text{N}_2(\text{A}^1) \rightarrow \text{N}_4^+ + \text{e}$        | $1.00 \times 10^{-11}$                              | 1 |
| R340 | $\text{N}(^2\text{D}) + \text{N}_2\text{O} \rightarrow \text{NO} + \text{N}_2$               | $3.50 \times 10^{-12}$                              | 1 |
| R341 | $\text{O}^- + \text{N}^+ \rightarrow \text{O} + \text{N}$                                    | $2.00 \times 10^{-7} (300.0/T_{\text{IONN}})^{0.5}$ | 1 |
| R342 | $\text{O}^- + \text{N}_2^+ \rightarrow \text{O} + \text{N}_2$                                | $2.00 \times 10^{-7} (300.0/T_{\text{IONN}})^{0.5}$ | 1 |
| R343 | $\text{O}^- + \text{O}^+ \rightarrow \text{O} + \text{O}$                                    | $2.00 \times 10^{-7} (300.0/T_{\text{IONN}})^{0.5}$ | 1 |
| R344 | $\text{O}^- + \text{O}_2^+ \rightarrow \text{O} + \text{O}_2$                                | $2.00 \times 10^{-7} (300.0/T_{\text{IONN}})^{0.5}$ | 1 |
| R345 | $\text{O}^- + \text{NO}^+ \rightarrow \text{O} + \text{NO}$                                  | $2.00 \times 10^{-7} (300.0/T_{\text{IONN}})^{0.5}$ | 1 |
| R346 | $\text{O}^- + \text{N}_2\text{O}^+ \rightarrow \text{O} + \text{N}_2\text{O}$                | $2.00 \times 10^{-7} (300.0/T_{\text{IONN}})^{0.5}$ | 1 |
| R347 | $\text{O}^- + \text{NO}_2^+ \rightarrow \text{O} + \text{NO}_2$                              | $2.00 \times 10^{-7} (300.0/T_{\text{IONN}})^{0.5}$ | 1 |
| R348 | $\text{O}_2^- + \text{N}^+ \rightarrow \text{O}_2 + \text{N}$                                | $2.00 \times 10^{-7} (300.0/T_{\text{IONN}})^{0.5}$ | 1 |
| R349 | $\text{O}_2^- + \text{N}_2^+ \rightarrow \text{O}_2 + \text{N}_2$                            | $2.00 \times 10^{-7} (300.0/T_{\text{IONN}})^{0.5}$ | 1 |
| R350 | $\text{O}_2^- + \text{O}^+ \rightarrow \text{O}_2 + \text{O}$                                | $2.00 \times 10^{-7} (300.0/T_{\text{IONN}})^{0.5}$ | 1 |
| R351 | $\text{O}_2^- + \text{O}_2^+ \rightarrow \text{O}_2 + \text{O}_2$                            | $2.00 \times 10^{-7} (300.0/T_{\text{IONN}})^{0.5}$ | 1 |
| R352 | $\text{O}_2^- + \text{NO}^+ \rightarrow \text{O}_2 + \text{NO}$                              | $2.00 \times 10^{-7} (300.0/T_{\text{IONN}})^{0.5}$ | 1 |
| R353 | $\text{O}_2^- + \text{N}_2\text{O}^+ \rightarrow \text{O}_2 + \text{N}_2\text{O}$            | $2.00 \times 10^{-7} (300.0/T_{\text{IONN}})^{0.5}$ | 1 |
| R354 | $\text{O}_2^- + \text{NO}_2^+ \rightarrow \text{O}_2 + \text{NO}_2$                          | $2.00 \times 10^{-7} (300.0/T_{\text{IONN}})^{0.5}$ | 1 |
| R355 | $\text{NO}^- + \text{N}^+ \rightarrow \text{NO} + \text{N}$                                  | $2.00 \times 10^{-7} (300.0/T_{\text{IONN}})^{0.5}$ | 1 |
| R356 | $\text{NO}^- + \text{N}_2^+ \rightarrow \text{NO} + \text{N}_2$                              | $2.00 \times 10^{-7} (300.0/T_{\text{IONN}})^{0.5}$ | 1 |
| R357 | $\text{NO}^- + \text{O}^+ \rightarrow \text{NO} + \text{O}$                                  | $2.00 \times 10^{-7} (300.0/T_{\text{IONN}})^{0.5}$ | 1 |
| R358 | $\text{NO}^- + \text{O}_2^+ \rightarrow \text{NO} + \text{O}_2$                              | $2.00 \times 10^{-7} (300.0/T_{\text{IONN}})^{0.5}$ | 1 |
| R359 | $\text{NO}^- + \text{NO}^+ \rightarrow \text{NO} + \text{NO}$                                | $2.00 \times 10^{-7} (300.0/T_{\text{IONN}})^{0.5}$ | 1 |
| R360 | $\text{NO}^- + \text{N}_2\text{O}^+ \rightarrow \text{NO} + \text{N}_2\text{O}$              | $2.00 \times 10^{-7} (300.0/T_{\text{IONN}})^{0.5}$ | 1 |

|      |                                                                                                   |                                                     |   |
|------|---------------------------------------------------------------------------------------------------|-----------------------------------------------------|---|
| R361 | $\text{NO}^- + \text{NO}_2^+ \rightarrow \text{NO} + \text{NO}_2$                                 | $2.00 \times 10^{-7} (300.0/T_{\text{IONN}})^{0.5}$ | 1 |
| R362 | $\text{N}_2\text{O}^- + \text{N}^+ \rightarrow \text{N}_2\text{O} + \text{N}$                     | $2.00 \times 10^{-7} (300.0/T_{\text{IONN}})^{0.5}$ | 1 |
| R363 | $\text{N}_2\text{O}^- + \text{N}_2^+ \rightarrow \text{N}_2\text{O} + \text{N}_2$                 | $2.00 \times 10^{-7} (300.0/T_{\text{IONN}})^{0.5}$ | 1 |
| R364 | $\text{N}_2\text{O}^- + \text{O}^+ \rightarrow \text{N}_2\text{O} + \text{O}$                     | $2.00 \times 10^{-7} (300.0/T_{\text{IONN}})^{0.5}$ | 1 |
| R365 | $\text{N}_2\text{O}^- + \text{O}_2^+ \rightarrow \text{N}_2\text{O} + \text{O}_2$                 | $2.00 \times 10^{-7} (300.0/T_{\text{IONN}})^{0.5}$ | 1 |
| R366 | $\text{N}_2\text{O}^- + \text{NO}^+ \rightarrow \text{N}_2\text{O} + \text{NO}$                   | $2.00 \times 10^{-7} (300.0/T_{\text{IONN}})^{0.5}$ | 1 |
| R367 | $\text{N}_2\text{O}^- + \text{N}_2\text{O}^+ \rightarrow \text{N}_2\text{O} + \text{N}_2\text{O}$ | $2.00 \times 10^{-7} (300.0/T_{\text{IONN}})^{0.5}$ | 1 |
| R368 | $\text{N}_2\text{O}^- + \text{NO}_2^+ \rightarrow \text{N}_2\text{O} + \text{NO}_2$               | $2.00 \times 10^{-7} (300.0/T_{\text{IONN}})^{0.5}$ | 1 |
| R369 | $\text{NO}_2^- + \text{N}^+ \rightarrow \text{NO}_2 + \text{N}$                                   | $2.00 \times 10^{-7} (300.0/T_{\text{IONN}})^{0.5}$ | 1 |
| R370 | $\text{NO}_2^- + \text{N}_2^+ \rightarrow \text{NO}_2 + \text{N}_2$                               | $2.00 \times 10^{-7} (300.0/T_{\text{IONN}})^{0.5}$ | 1 |
| R371 | $\text{NO}_2^- + \text{O}^+ \rightarrow \text{NO}_2 + \text{O}$                                   | $2.00 \times 10^{-7} (300.0/T_{\text{IONN}})^{0.5}$ | 1 |
| R372 | $\text{NO}_2^- + \text{O}_2^+ \rightarrow \text{NO}_2 + \text{O}_2$                               | $2.00 \times 10^{-7} (300.0/T_{\text{IONN}})^{0.5}$ | 1 |
| R373 | $\text{NO}_2^- + \text{NO}^+ \rightarrow \text{NO}_2 + \text{NO}$                                 | $2.00 \times 10^{-7} (300.0/T_{\text{IONN}})^{0.5}$ | 1 |
| R374 | $\text{NO}_2^- + \text{N}_2\text{O}^+ \rightarrow \text{NO}_2 + \text{N}_2\text{O}$               | $2.00 \times 10^{-7} (300.0/T_{\text{IONN}})^{0.5}$ | 1 |
| R375 | $\text{NO}_2^- + \text{NO}_2^+ \rightarrow \text{NO}_2 + \text{NO}_2$                             | $2.00 \times 10^{-7} (300.0/T_{\text{IONN}})^{0.5}$ | 1 |
| R376 | $\text{NO}_3^- + \text{N}^+ \rightarrow \text{NO}_3 + \text{N}$                                   | $2.00 \times 10^{-7} (300.0/T_{\text{IONN}})^{0.5}$ | 1 |
| R377 | $\text{NO}_3^- + \text{N}_2^+ \rightarrow \text{NO}_3 + \text{N}_2$                               | $2.00 \times 10^{-7} (300.0/T_{\text{IONN}})^{0.5}$ | 1 |
| R378 | $\text{NO}_3^- + \text{O}^+ \rightarrow \text{NO}_3 + \text{O}$                                   | $2.00 \times 10^{-7} (300.0/T_{\text{IONN}})^{0.5}$ | 1 |
| R379 | $\text{NO}_3^- + \text{O}_2^+ \rightarrow \text{NO}_3 + \text{O}_2$                               | $2.00 \times 10^{-7} (300.0/T_{\text{IONN}})^{0.5}$ | 1 |
| R380 | $\text{NO}_3^- + \text{NO}^+ \rightarrow \text{NO}_3 + \text{NO}$                                 | $2.00 \times 10^{-7} (300.0/T_{\text{IONN}})^{0.5}$ | 1 |
| R381 | $\text{NO}_3^- + \text{N}_2\text{O}^+ \rightarrow \text{NO}_3 + \text{N}_2\text{O}$               | $2.00 \times 10^{-7} (300.0/T_{\text{IONN}})^{0.5}$ | 1 |
| R382 | $\text{NO}_3^- + \text{NO}_2^+ \rightarrow \text{NO}_3 + \text{NO}_2$                             | $2.00 \times 10^{-7} (300.0/T_{\text{IONN}})^{0.5}$ | 1 |
| R383 | $\text{O}^- + \text{N}_2^+ \rightarrow \text{O} + \text{N} + \text{N}$                            | $1.00 \times 10^{-7}$                               | 1 |
| R384 | $\text{O}^- + \text{N}_3^+ \rightarrow \text{O} + \text{N} + \text{N}_2$                          | $1.00 \times 10^{-7}$                               | 1 |
| R385 | $\text{O}^- + \text{N}_4^+ \rightarrow \text{O} + \text{N}_2 + \text{N}_2$                        | $1.00 \times 10^{-7}$                               | 1 |
| R386 | $\text{O}^- + \text{O}_2^+ \rightarrow \text{O} + \text{O} + \text{O}$                            | $1.00 \times 10^{-7}$                               | 1 |
| R387 | $\text{O}^- + \text{O}_4^+ \rightarrow \text{O} + \text{O}_2 + \text{O}_2$                        | $1.00 \times 10^{-7}$                               | 1 |
| R388 | $\text{O}^- + \text{NO}^+ \rightarrow \text{O} + \text{N} + \text{O}$                             | $1.00 \times 10^{-7}$                               | 1 |
| R389 | $\text{O}^- + \text{N}_2\text{O}^+ \rightarrow \text{O} + \text{N}_2 + \text{O}$                  | $1.00 \times 10^{-7}$                               | 1 |
| R390 | $\text{O}^- + \text{NO}_2^+ \rightarrow \text{O} + \text{N} + \text{O}_2$                         | $1.00 \times 10^{-7}$                               | 1 |
| R391 | $\text{O}^- + \text{O}_2^+ \text{N}_2 \rightarrow \text{O} + \text{O}_2 + \text{N}_2$             | $1.00 \times 10^{-7}$                               | 1 |

|      |                                                   |                       |   |
|------|---------------------------------------------------|-----------------------|---|
| R392 | $O_2^- + N_2^+ \rightarrow O_2 + N + N$           | $1.00 \times 10^{-7}$ | 1 |
| R393 | $O_2^- + N_3^+ \rightarrow O_2 + N + N_2$         | $1.00 \times 10^{-7}$ | 1 |
| R394 | $O_2^- + N_4^+ \rightarrow O_2 + N_2 + N_2$       | $1.00 \times 10^{-7}$ | 1 |
| R395 | $O_2^- + O_2^+ \rightarrow O_2 + O + O$           | $1.00 \times 10^{-7}$ | 1 |
| R396 | $O_2^- + O_4^+ \rightarrow O_2 + O_2 + O_2$       | $1.00 \times 10^{-7}$ | 1 |
| R397 | $O_2^- + NO^+ \rightarrow O_2 + N + O$            | $1.00 \times 10^{-7}$ | 1 |
| R398 | $O_2^- + N_2O^+ \rightarrow O_2 + N_2 + O$        | $1.00 \times 10^{-7}$ | 1 |
| R399 | $O_2^- + NO_2^+ \rightarrow O_2 + N + O_2$        | $1.00 \times 10^{-7}$ | 1 |
| R400 | $O_2^- + O_2^+ N_2 \rightarrow O_2 + O_2 + N_2$   | $1.0 \times 10^{-7}$  | 1 |
| R401 | $NO^- + N_2^+ \rightarrow NO + N + N$             | $1.00 \times 10^{-7}$ | 1 |
| R402 | $NO^- + N_3^+ \rightarrow NO + N + N_2$           | $1.00 \times 10^{-7}$ | 1 |
| R403 | $NO^- + N_4^+ \rightarrow NO + N_2 + N_2$         | $1.00 \times 10^{-7}$ | 1 |
| R404 | $NO^- + O_2^+ \rightarrow NO + O + O$             | $1.00 \times 10^{-7}$ | 1 |
| R405 | $NO^- + O_4^+ \rightarrow NO + O_2 + O_2$         | $1.00 \times 10^{-7}$ | 1 |
| R406 | $NO^- + NO^+ \rightarrow NO + N + O$              | $1.00 \times 10^{-7}$ | 1 |
| R407 | $NO^- + N_2O^+ \rightarrow NO + N_2 + O$          | $1.00 \times 10^{-7}$ | 1 |
| R408 | $NO^- + NO_2^+ \rightarrow NO + N + O_2$          | $1.00 \times 10^{-7}$ | 1 |
| R409 | $NO^- + O_2^+ N_2 \rightarrow NO + O_2 + N_2$     | $1.00 \times 10^{-7}$ | 1 |
| R410 | $N_2O^- + N_2^+ \rightarrow N_2O + N + N$         | $1.00 \times 10^{-7}$ | 1 |
| R411 | $N_2O^- + N_3^+ \rightarrow N_2O + N + N_2$       | $1.00 \times 10^{-7}$ | 1 |
| R412 | $N_2O^- + N_4^+ \rightarrow N_2O + N_2 + N_2$     | $1.00 \times 10^{-7}$ | 1 |
| R413 | $N_2O^- + O_2^+ \rightarrow N_2O + O + O$         | $1.00 \times 10^{-7}$ | 1 |
| R414 | $N_2O^- + O_4^+ \rightarrow N_2O + O_2 + O_2$     | $1.00 \times 10^{-7}$ | 1 |
| R415 | $N_2O^- + NO^+ \rightarrow N_2O + N + O$          | $1.00 \times 10^{-7}$ | 1 |
| R416 | $N_2O^- + N_2O^+ \rightarrow N_2O + N_2 + O$      | $1.00 \times 10^{-7}$ | 1 |
| R417 | $N_2O^- + NO_2^+ \rightarrow N_2O + N + O_2$      | $1.00 \times 10^{-7}$ | 1 |
| R418 | $N_2O^- + O_2^+ N_2 \rightarrow N_2O + O_2 + N_2$ | $1.00 \times 10^{-7}$ | 1 |
| R419 | $NO_2^- + N_2^+ \rightarrow NO_2 + N + N$         | $1.00 \times 10^{-7}$ | 1 |
| R420 | $NO_2^- + N_3^+ \rightarrow NO_2 + N + N_2$       | $1.00 \times 10^{-7}$ | 1 |
| R421 | $NO_2^- + N_4^+ \rightarrow NO_2 + N_2 + N_2$     | $1.00 \times 10^{-7}$ | 1 |
| R422 | $NO_2^- + O_2^+ \rightarrow NO_2 + O + O$         | $1.00 \times 10^{-7}$ | 1 |

|      |                                                   |                                               |   |
|------|---------------------------------------------------|-----------------------------------------------|---|
| R423 | $O_2^- + O_4^+ \rightarrow NO_2 + O_2 + O_2$      | $1.00 \times 10^{-7}$                         | 1 |
| R424 | $NO_2^- + NO^+ \rightarrow NO_2 + N + O$          | $1.00 \times 10^{-7}$                         | 1 |
| R425 | $NO_2^- + N_2O^+ \rightarrow NO_2 + N_2 + O$      | $1.00 \times 10^{-7}$                         | 1 |
| R426 | $NO_2^- + NO_2^+ \rightarrow NO_2 + N + O_2$      | $1.00 \times 10^{-7}$                         | 1 |
| R427 | $NO_2^- + O_2^+ N_2 \rightarrow NO_2 + O_2 + N_2$ | $1.00 \times 10^{-7}$                         | 1 |
| R428 | $NO_3^- + N_2^+ \rightarrow NO_3 + N + N$         | $1.00 \times 10^{-7}$                         | 1 |
| R429 | $NO_3^- + N_3^+ \rightarrow NO_3 + N + N_2$       | $1.00 \times 10^{-7}$                         | 1 |
| R430 | $NO_3^- + N_4^+ \rightarrow NO_3 + N_2 + N_2$     | $1.00 \times 10^{-7}$                         | 1 |
| R431 | $NO_3^- + O_2^+ \rightarrow NO_3 + O + O$         | $1.00 \times 10^{-7}$                         | 1 |
| R432 | $NO_3^- + O_4^+ \rightarrow NO_3 + O_2 + O_2$     | $1.00 \times 10^{-7}$                         | 1 |
| R433 | $NO_3^- + NO^+ \rightarrow NO_3 + N + O$          | $1.00 \times 10^{-7}$                         | 1 |
| R434 | $NO_3^- + N_2O^+ \rightarrow NO_3 + N_2 + O$      | $1.00 \times 10^{-7}$                         | 1 |
| R435 | $NO_3^- + NO_2^+ \rightarrow NO_3 + N + O_2$      | $1.00 \times 10^{-7}$                         | 1 |
| R436 | $NO_3^- + O_2^+ N_2 \rightarrow NO_3 + O_2 + N_2$ | $1.00 \times 10^{-7}$                         | 1 |
| R437 | $O^- + N^+ + M \rightarrow O + N + M$             | $2.00 \times 10^{-25} (300.0/T_{IONN})^{2.5}$ | 1 |
| R438 | $O^- + N_2^+ + M \rightarrow O + N_2 + M$         | $2.00 \times 10^{-25} (300.0/T_{IONN})^{2.5}$ | 1 |
| R439 | $O^- + O^+ + M \rightarrow O + O + M$             | $2.00 \times 10^{-25} (300.0/T_{IONN})^{2.5}$ | 1 |
| R440 | $O^- + O_2^+ + M \rightarrow O + O_2 + M$         | $2.00 \times 10^{-25} (300.0/T_{IONN})^{2.5}$ | 1 |
| R441 | $O^- + NO^+ + M \rightarrow O + NO + M$           | $2.00 \times 10^{-25} (300.0/T_{IONN})^{2.5}$ | 1 |
| R442 | $O_2^- + N^+ + M \rightarrow O_2 + N + M$         | $2.00 \times 10^{-25} (300.0/T_{IONN})^{2.5}$ | 1 |
| R443 | $O_2^- + N_2^+ + M \rightarrow O_2 + N_2 + M$     | $2.00 \times 10^{-25} (300.0/T_{IONN})^{2.5}$ | 1 |
| R444 | $O_2^- + O^+ + M \rightarrow O_2 + O + M$         | $2.00 \times 10^{-25} (300.0/T_{IONN})^{2.5}$ | 1 |
| R445 | $O_2^- + O_2^+ + M \rightarrow O_2 + O_2 + M$     | $2.00 \times 10^{-25} (300.0/T_{IONN})^{2.5}$ | 1 |
| R446 | $O_2^- + NO^+ + M \rightarrow O_2 + NO + M$       | $2.00 \times 10^{-25} (300.0/T_{IONN})^{2.5}$ | 1 |
| R447 | $O^- + N^+ + M \rightarrow NO + M$                | $2.00 \times 10^{-25} (300.0/T_{IONN})^{2.5}$ | 1 |
| R448 | $O^- + N_2^+ + M \rightarrow N_2O + M$            | $2.00 \times 10^{-25} (300.0/T_{IONN})^{2.5}$ | 1 |
| R449 | $O^- + O^+ + M \rightarrow O_2 + M$               | $2.00 \times 10^{-25} (300.0/T_{IONN})^{2.5}$ | 1 |
| R450 | $O^- + O_2^+ + M \rightarrow O_3 + M$             | $2.00 \times 10^{-25} (300.0/T_{IONN})^{2.5}$ | 1 |
| R451 | $O^- + NO^+ + M \rightarrow NO_2 + M$             | $2.00 \times 10^{-25} (300.0/T_{IONN})^{2.5}$ | 1 |
| R452 | $O_2^- + N^+ + M \rightarrow NO_2 + M$            | $2.00 \times 10^{-25} (300.0/T_{IONN})^{2.5}$ | 1 |
| R453 | $O_2^- + O^+ + M \rightarrow O_3 + M$             | $2.00 \times 10^{-25} (300.0/T_{IONN})^{2.5}$ | 1 |

|      |                                                   |                                               |   |
|------|---------------------------------------------------|-----------------------------------------------|---|
| R454 | $O_2^- + NO^+ + M \rightarrow NO_3 + M$           | $2.00 \times 10^{-25} (300.0/T_{IONN})^{2.5}$ | 1 |
| R455 | $NO^- + N^+ + M \rightarrow NO + N + M$           | $2.00 \times 10^{-25} (300.0/T_{IONN})^{2.5}$ | 1 |
| R456 | $NO^- + N_2^+ + M \rightarrow NO + N_2 + M$       | $2.00 \times 10^{-25} (300.0/T_{IONN})^{2.5}$ | 1 |
| R457 | $NO^- + O^+ + M \rightarrow NO + O + M$           | $2.00 \times 10^{-25} (300.0/T_{IONN})^{2.5}$ | 1 |
| R458 | $NO^- + O_2^+ + M \rightarrow NO + O_2 + M$       | $2.00 \times 10^{-25} (300.0/T_{IONN})^{2.5}$ | 1 |
| R459 | $NO^- + NO^+ + M \rightarrow NO + NO + M$         | $2.00 \times 10^{-25} (300.0/T_{IONN})^{2.5}$ | 1 |
| R460 | $NO^- + N_2O^+ + M \rightarrow NO + N_2O + M$     | $2.00 \times 10^{-25} (300.0/T_{IONN})^{2.5}$ | 1 |
| R461 | $NO^- + NO_2^+ + M \rightarrow NO + NO_2 + M$     | $2.00 \times 10^{-25} (300.0/T_{IONN})^{2.5}$ | 1 |
| R462 | $N_2O^- + N^+ + M \rightarrow N_2O + N + M$       | $2.00 \times 10^{-25} (300.0/T_{IONN})^{2.5}$ | 1 |
| R463 | $N_2O^- + N_2^+ + M \rightarrow N_2O + N_2 + M$   | $2.00 \times 10^{-25} (300.0/T_{IONN})^{2.5}$ | 1 |
| R464 | $N_2O^- + O^+ + M \rightarrow N_2O + O + M$       | $2.00 \times 10^{-25} (300.0/T_{IONN})^{2.5}$ | 1 |
| R465 | $N_2O^- + O_2^+ + M \rightarrow N_2O + O_2 + M$   | $2.00 \times 10^{-25} (300.0/T_{IONN})^{2.5}$ | 1 |
| R466 | $N_2O^- + NO^+ + M \rightarrow N_2O + NO + M$     | $2.00 \times 10^{-25} (300.0/T_{IONN})^{2.5}$ | 1 |
| R467 | $N_2O^- + N_2O^+ + M \rightarrow N_2O + N_2O + M$ | $2.00 \times 10^{-25} (300.0/T_{IONN})^{2.5}$ | 1 |
| R468 | $N_2O^- + NO_2^+ + M \rightarrow N_2O + NO_2 + M$ | $2.00 \times 10^{-25} (300.0/T_{IONN})^{2.5}$ | 1 |
| R469 | $NO_2^- + N^+ + M \rightarrow NO_2 + N + M$       | $2.00 \times 10^{-25} (300.0/T_{IONN})^{2.5}$ | 1 |
| R470 | $NO_2^- + N_2^+ + M \rightarrow NO_2 + N_2 + M$   | $2.00 \times 10^{-25} (300.0/T_{IONN})^{2.5}$ | 1 |
| R471 | $NO_2^- + O^+ + M \rightarrow NO_2 + O + M$       | $2.00 \times 10^{-25} (300.0/T_{IONN})^{2.5}$ | 1 |
| R472 | $NO_2^- + O_2^+ + M \rightarrow NO_2 + O_2 + M$   | $2.00 \times 10^{-25} (300.0/T_{IONN})^{2.5}$ | 1 |
| R473 | $NO_2^- + NO^+ + M \rightarrow NO_2 + NO + M$     | $2.00 \times 10^{-25} (300.0/T_{IONN})^{2.5}$ | 1 |
| R474 | $NO_2^- + N_2O^+ + M \rightarrow NO_2 + N_2O + M$ | $2.00 \times 10^{-25} (300.0/T_{IONN})^{2.5}$ | 1 |
| R475 | $NO_2^- + NO_2^+ + M \rightarrow NO_2 + NO_2 + M$ | $2.00 \times 10^{-25} (300.0/T_{IONN})^{2.5}$ | 1 |
| R476 | $NO_3^- + N^+ + M \rightarrow NO_3 + N + M$       | $2.00 \times 10^{-25} (300.0/T_{IONN})^{2.5}$ | 1 |
| R477 | $NO_3^- + N_2^+ + M \rightarrow NO_3 + N_2 + M$   | $2.00 \times 10^{-25} (300.0/T_{IONN})^{2.5}$ | 1 |
| R478 | $NO_3^- + O^+ + M \rightarrow NO_3 + O + M$       | $2.00 \times 10^{-25} (300.0/T_{IONN})^{2.5}$ | 1 |
| R479 | $NO_3^- + O_2^+ + M \rightarrow NO_3 + O_2 + M$   | $2.00 \times 10^{-25} (300.0/T_{IONN})^{2.5}$ | 1 |
| R480 | $NO_3^- + NO^+ + M \rightarrow NO_3 + NO + M$     | $2.00 \times 10^{-25} (300.0/T_{IONN})^{2.5}$ | 1 |
| R481 | $NO_3^- + N_2O^+ + M \rightarrow NO_3 + N_2O + M$ | $2.00 \times 10^{-25} (300.0/T_{IONN})^{2.5}$ | 1 |
| R482 | $NO_3^- + NO_2^+ + M \rightarrow NO_3 + NO_2 + M$ | $2.00 \times 10^{-25} (300.0/T_{IONN})^{2.5}$ | 1 |
| R483 | $O_2^- + O \rightarrow O_3 + e$                   | $1.50 \times 10^{-10}$                        | 1 |
| R484 | $e + N_2O + M \rightarrow N_2O^- + M$             | $6.00 \times 10^{-33}$                        | 1 |

|      |                                                                                                 |                                                |   |
|------|-------------------------------------------------------------------------------------------------|------------------------------------------------|---|
| R485 | $e+\text{NO}+\text{M}\rightarrow\text{NO}^{-}+\text{M}$                                         | $8.00\times 10^{-31}$                          | 1 |
| R486 | $\text{NO}^{-}+\text{N}\rightarrow\text{N}_2\text{O}+\text{e}$                                  | $5.0\times 10^{-10}$                           | 1 |
| R487 | $\text{NO}^{-}+\text{O}\rightarrow\text{NO}_2+\text{e}$                                         | $1.50\times 10^{-10}$                          | 1 |
| R488 | $\text{N}^{+}+\text{O}+\text{M}\rightarrow\text{NO}^{+}+\text{M}$                               | $1.00\times 10^{-29}$                          | 1 |
| R489 | $\text{N}^{+}+\text{N}+\text{M}\rightarrow\text{N}_2^{+}+\text{M}$                              | $1.00\times 10^{-29}$                          | 1 |
| R490 | $\text{O}^{+}+\text{N}_2+\text{M}\rightarrow\text{NO}^{+}+\text{N}+\text{M}$                    | $6.00\times 10^{-29}(300.0/T_{\text{eFFN}})^2$ | 1 |
| R491 | $\text{O}^{+}+\text{O}+\text{M}\rightarrow\text{O}_2^{+}+\text{M}$                              | $1.00\times 10^{-29}$                          | 1 |
| R492 | $\text{O}^{+}+\text{N}+\text{M}\rightarrow\text{NO}^{+}+\text{M}$                               | $1.00\times 10^{-29}$                          | 1 |
| R493 | $\text{O}^{-}+\text{O}_3\rightarrow\text{O}_3^{-}+\text{O}$                                     | $8.00\times 10^{-10}$                          | 1 |
| R494 | $\text{O}_2^{-}+\text{O}_3\rightarrow\text{O}_3^{-}+\text{O}_2$                                 | $3.50\times 10^{-10}$                          | 1 |
| R495 | $e+\text{O}_3+\text{M}\rightarrow\text{O}_3^{-}+\text{M}$                                       | $5.00\times 10^{-31}T_{\text{e}}^{(-0.5)}$     | 1 |
| R496 | $\text{O}_3^{-}+\text{O}\rightarrow\text{O}_2+\text{O}_2^{-}$                                   | $2.50\times 10^{-10}$                          | 1 |
| R497 | $\text{O}_3^{-}+\text{O}\rightarrow\text{O}_3+\text{O}^{-}$                                     | $1.00\times 10^{-13}$                          | 1 |
| R498 | $\text{O}_3^{-}+\text{O}\rightarrow\text{O}_2+\text{O}_2+\text{e}$                              | $1.00\times 10^{-13}$                          | 1 |
| R499 | $\text{O}_3^{-}+\text{O}_2\rightarrow\text{O}_2+\text{O}_3+\text{e}$                            | $2.30\times 10^{-11}$                          | 1 |
| R500 | $\text{O}_3^{-}+\text{O}_3\rightarrow\text{O}_2+\text{O}_2+\text{O}_2+\text{e}$                 | $3.00\times 10^{-10}$                          | 1 |
| R501 | $\text{O}_3^{-}+\text{N}\rightarrow\text{NO}+\text{O}_2+\text{e}$                               | $5.00\times 10^{-10}$                          | 1 |
| R502 | $\text{N}_2\text{O}^{-}+\text{N}\rightarrow\text{NO}+\text{N}_2+\text{e}$                       | $5.00\times 10^{-10}$                          | 1 |
| R503 | $\text{NO}_2^{-}+\text{N}\rightarrow\text{NO}+\text{NO}+\text{e}$                               | $5.00\times 10^{-10}$                          | 1 |
| R504 | $\text{NO}_3^{-}+\text{N}\rightarrow\text{NO}+\text{NO}_2+\text{e}$                             | $5.00\times 10^{-10}$                          | 1 |
| R505 | $\text{N}_2\text{O}^{-}+\text{O}\rightarrow\text{NO}+\text{NO}+\text{e}$                        | $1.50\times 10^{-10}$                          | 1 |
| R506 | $\text{NO}_2^{-}+\text{O}\rightarrow\text{NO}+\text{O}_2+\text{e}$                              | $1.50\times 10^{-10}$                          | 1 |
| R507 | $\text{NO}_3^{-}+\text{O}\rightarrow\text{NO}+\text{O}_3+\text{e}$                              | $1.50\times 10^{-10}$                          | 1 |
| R508 | $\text{O}_3^{-}+\text{N}_2(\text{A3})\rightarrow\text{O}_3+\text{N}_2+\text{e}$                 | $2.10\times 10^{-9}$                           | 1 |
| R509 | $\text{NO}^{-}+\text{N}_2(\text{A3})\rightarrow\text{NO}+\text{N}_2+\text{e}$                   | $2.10\times 10^{-9}$                           | 1 |
| R510 | $\text{N}_2\text{O}^{-}+\text{N}_2(\text{A3})\rightarrow\text{N}_2\text{O}+\text{N}_2+\text{e}$ | $2.10\times 10^{-9}$                           | 1 |
| R511 | $\text{NO}_2^{-}+\text{N}_2(\text{A3})\rightarrow\text{NO}_2+\text{N}_2+\text{e}$               | $2.10\times 10^{-9}$                           | 1 |
| R512 | $\text{NO}_3^{-}+\text{N}_2(\text{A3})\rightarrow\text{NO}_3+\text{N}_2+\text{e}$               | $2.10\times 10^{-9}$                           | 1 |
| R513 | $\text{O}_3^{-}+\text{N}_2(\text{B3})\rightarrow\text{O}_3+\text{N}_2+\text{e}$                 | $2.10\times 10^{-9}$                           | 1 |
| R514 | $\text{NO}^{-}+\text{N}_2(\text{B3})\rightarrow\text{NO}+\text{N}_2+\text{e}$                   | $2.10\times 10^{-9}$                           | 1 |
| R515 | $\text{N}_2\text{O}^{-}+\text{N}_2(\text{B3})\rightarrow\text{N}_2\text{O}+\text{N}_2+\text{e}$ | $2.10\times 10^{-9}$                           | 1 |



|      |                                                                                                         |                                                      |   |
|------|---------------------------------------------------------------------------------------------------------|------------------------------------------------------|---|
| R516 | $\text{NO}_2^- + \text{N}_2(\text{B3}) \rightarrow \text{NO}_2 + \text{N}_2 + \text{e}$                 | $2.10 \times 10^{-9}$                                | 1 |
| R517 | $\text{NO}_3^- + \text{N}_2(\text{B3}) \rightarrow \text{NO}_3 + \text{N}_2 + \text{e}$                 | $2.10 \times 10^{-9}$                                | 1 |
| R518 | $\text{O}_3^- + \text{N}^+ + \text{M} \rightarrow \text{O}_3 + \text{N} + \text{M}$                     | $2.00 \times 10^{-25} (300.0/T_{\text{IONN}})^{2.5}$ | 1 |
| R519 | $\text{O}_3^- + \text{N}_2^+ + \text{M} \rightarrow \text{O}_3 + \text{N}_2 + \text{M}$                 | $2.00 \times 10^{-25} (300.0/T_{\text{IONN}})^{2.5}$ | 1 |
| R520 | $\text{O}_3^- + \text{O}^+ + \text{M} \rightarrow \text{O}_3 + \text{O} + \text{M}$                     | $2.00 \times 10^{-25} (300.0/T_{\text{IONN}})^{2.5}$ | 1 |
| R521 | $\text{O}_3^- + \text{O}_2^+ + \text{M} \rightarrow \text{O}_3 + \text{O}_2 + \text{M}$                 | $2.00 \times 10^{-25} (300.0/T_{\text{IONN}})^{2.5}$ | 1 |
| R522 | $\text{O}_3^- + \text{NO}^+ + \text{M} \rightarrow \text{O}_3 + \text{NO} + \text{M}$                   | $2.00 \times 10^{-25} (300.0/T_{\text{IONN}})^{2.5}$ | 1 |
| R523 | $\text{O}_3^- + \text{N}_2\text{O}^+ + \text{M} \rightarrow \text{O}_3 + \text{N}_2\text{O} + \text{M}$ | $2.00 \times 10^{-25} (300.0/T_{\text{IONN}})^{2.5}$ | 1 |
| R524 | $\text{O}_3^- + \text{NO}_2^+ + \text{M} \rightarrow \text{O}_3 + \text{NO}_2 + \text{M}$               | $2.00 \times 10^{-25} (300.0/T_{\text{IONN}})^{2.5}$ | 1 |
| R525 | $\text{O}_3^- + \text{N}_2^+ \rightarrow \text{O}_3 + \text{N} + \text{N}$                              | $1.00 \times 10^{-7}$                                | 1 |
| R526 | $\text{O}_3^- + \text{N}_3^+ \rightarrow \text{O}_3 + \text{N} + \text{N}_2$                            | $1.00 \times 10^{-7}$                                | 1 |
| R527 | $\text{O}_3^- + \text{N}_4^+ \rightarrow \text{O}_3 + \text{N}_2 + \text{N}_2$                          | $1.00 \times 10^{-7}$                                | 1 |
| R528 | $\text{O}_3^- + \text{O}_2^+ \rightarrow \text{O}_3 + \text{O} + \text{O}$                              | $1.00 \times 10^{-7}$                                | 1 |
| R529 | $\text{O}_3^- + \text{O}_4^+ \rightarrow \text{O}_3 + \text{O}_2 + \text{O}_2$                          | $1.00 \times 10^{-7}$                                | 1 |
| R530 | $\text{O}_3^- + \text{NO}^+ \rightarrow \text{O}_3 + \text{N} + \text{O}$                               | $1.00 \times 10^{-7}$                                | 1 |
| R531 | $\text{O}_3^- + \text{N}_2\text{O}^+ \rightarrow \text{O}_3 + \text{N}_2 + \text{O}$                    | $1.00 \times 10^{-7}$                                | 1 |
| R532 | $\text{O}_3^- + \text{NO}_2^+ \rightarrow \text{O}_3 + \text{N} + \text{O}_2$                           | $1.00 \times 10^{-7}$                                | 1 |
| R533 | $\text{O}_3^- + \text{O}_2^+ \text{N}_2 \rightarrow \text{O}_3 + \text{O}_2 + \text{N}_2$               | $1.00 \times 10^{-7}$                                | 1 |
| R534 | $\text{O}_3^- + \text{N}^+ \rightarrow \text{O}_3 + \text{N}$                                           | $2.0 \times 10^{-7} (300.0/T_{\text{IONN}})^{0.5}$   | 1 |
| R535 | $\text{O}_3^- + \text{N}_2^+ \rightarrow \text{O}_3 + \text{N}_2$                                       | $2.0 \times 10^{-7} (300.0/T_{\text{IONN}})^{0.5}$   | 1 |
| R536 | $\text{O}_3^- + \text{O}^+ \rightarrow \text{O}_3 + \text{O}$                                           | $2.0 \times 10^{-7} (300.0/T_{\text{IONN}})^{0.5}$   | 1 |
| R537 | $\text{O}_3^- + \text{O}_2^+ \rightarrow \text{O}_3 + \text{O}_2$                                       | $2.0 \times 10^{-7} (300.0/T_{\text{IONN}})^{0.5}$   | 1 |
| R538 | $\text{O}_3^- + \text{NO}^+ \rightarrow \text{O}_3 + \text{NO}$                                         | $2.0 \times 10^{-7} (300.0/T_{\text{IONN}})^{0.5}$   | 1 |
| R539 | $\text{O}_3^- + \text{N}_2\text{O}^+ \rightarrow \text{O}_3 + \text{N}_2\text{O}$                       | $2.0 \times 10^{-7} (300.0/T_{\text{IONN}})^{0.5}$   | 1 |
| R540 | $\text{O}_3^- + \text{NO}_2^+ \rightarrow \text{O}_3 + \text{NO}_2$                                     | $2.0 \times 10^{-7} (300.0/T_{\text{IONN}})^{0.5}$   | 1 |
| R541 | $\text{O}_3^- + \text{NO} \rightarrow \text{NO}_3^- + \text{O}$                                         | $1.00 \times 10^{-11}$                               | 1 |
| R542 | $\text{O}_3^- + \text{NO} \rightarrow \text{NO}_2^- + \text{O}_2$                                       | $2.60 \times 10^{-12}$                               | 1 |
| R543 | $\text{O}_3^- + \text{NO}_2 \rightarrow \text{NO}_2^- + \text{O}_3$                                     | $7.00 \times 10^{-11}$                               | 1 |
| R544 | $\text{O}_3^- + \text{NO}_2 \rightarrow \text{NO}_3^- + \text{O}_2$                                     | $2.00 \times 10^{-11}$                               | 1 |
| R545 | $\text{O}_3^- + \text{NO}_3 \rightarrow \text{NO}_3^- + \text{O}_3$                                     | $5.00 \times 10^{-10}$                               | 1 |
| R546 | $\text{O}_2^- + \text{O}_2 + \text{M} \rightarrow \text{O}_4^- + \text{M}$                              | $3.50 \times 10^{-31} (300.0/T_{\text{eFFN2}})$      | 1 |

|      |                                                       |                                                                                     |   |
|------|-------------------------------------------------------|-------------------------------------------------------------------------------------|---|
| R547 | $O_4^- + N_2 \rightarrow O_2^- + O_2 + N_2$           | $1.00 \times 10^{-10} \exp(-1044.0/T_{eFFN4})$                                      | 1 |
| R548 | $O_4^- + O_2 \rightarrow O_2^- + O_2 + O_2$           | $1.00 \times 10^{-10} \exp(-1044.0/T_{eFFN4})$                                      | 1 |
| R549 | $O_4^- + O \rightarrow O_3^- + O_2$                   | $4.00 \times 10^{-10}$                                                              | 1 |
| R550 | $O_4^- + O \rightarrow O^- + O_2 + O_2$               | $3.00 \times 10^{-10}$                                                              | 1 |
| R551 | $O_4^- + O_2(A1) \rightarrow O_2^- + O_2 + O_2$       | $1.00 \times 10^{-10}$                                                              | 1 |
| R552 | $O_4^- + O_2(B1) \rightarrow O_2^- + O_2 + O_2$       | $1.00 \times 10^{-10}$                                                              | 1 |
| R553 | $O_4^- + NO \rightarrow NO_3^- + O_2$                 | $2.50 \times 10^{-10}$                                                              | 1 |
| R554 | $O_4^- + N^+ \rightarrow O_2 + O_2 + N$               | $1.00 \times 10^{-7}$                                                               | 1 |
| R555 | $O_4^- + N_2^+ \rightarrow O_2 + O_2 + N_2$           | $1.00 \times 10^{-7}$                                                               | 1 |
| R556 | $O_4^- + O^+ \rightarrow O_2 + O_2 + O$               | $1.00 \times 10^{-7}$                                                               | 1 |
| R557 | $O_4^- + O_2^+ \rightarrow O_2 + O_2 + O_2$           | $1.00 \times 10^{-7}$                                                               | 1 |
| R558 | $O_4^- + NO^+ \rightarrow O_2 + O_2 + NO$             | $1.00 \times 10^{-7}$                                                               | 1 |
| R559 | $O_4^- + N_2O^+ \rightarrow O_2 + O_2 + N_2O$         | $1.00 \times 10^{-7}$                                                               | 1 |
| R560 | $O_4^- + NO_2^+ \rightarrow O_2 + O_2 + NO_2$         | $1.00 \times 10^{-7}$                                                               | 1 |
| R561 | $O_4^- + N_3^+ \rightarrow O_2 + O_2 + N_2 + N$       | $1.00 \times 10^{-7}$                                                               | 1 |
| R562 | $O_4^- + N_4^+ \rightarrow O_2 + O_2 + N_2 + N_2$     | $1.00 \times 10^{-7}$                                                               | 1 |
| R563 | $O_4^- + O_4^+ \rightarrow O_2 + O_2 + O_2 + O_2$     | $1.00 \times 10^{-7}$                                                               | 1 |
| R564 | $O_4^- + O_2^+ N_2 \rightarrow O_2 + O_2 + O_2 + N_2$ | $1.00 \times 10^{-7}$                                                               | 1 |
| R565 | $NO^- + O_2 \rightarrow O_2^- + NO$                   | $5.00 \times 10^{-10}$                                                              | 1 |
| R566 | $O^- + O_2(A1) \rightarrow O_2^- + O$                 | $1.00 \times 10^{-10}$                                                              | 1 |
| R567 | $O_2^- + O \rightarrow O^- + O_2$                     | $3.30 \times 10^{-10}$                                                              | 1 |
| R568 | $O^+ + N_2 \rightarrow NO^+ + N$                      | $(1.5-2.0 \times 10^{-3} T_{eFFN} + 9.6 \times 10^{-7} T_{eFFN}^2) \times 10^{-12}$ | 1 |
| R569 | $O^+ + O_2 \rightarrow O_2^+ + O$                     | $2.00 \times 10^{-11} (300.0/T_{eFFN})^{0.5}$                                       | 1 |
| R570 | $N_2^+ + O \rightarrow NO^+ + N$                      | $1.30 \times 10^{-10} (300.0/T_{eFFN2})^{0.5}$                                      | 1 |
| R571 | $O_2^+ + N_2 \rightarrow NO^+ + NO$                   | $1.00 \times 10^{-17}$                                                              | 1 |
| R572 | $O_2^+ + N \rightarrow NO^+ + O$                      | $1.20 \times 10^{-10}$                                                              | 1 |
| R573 | $N_2^+ + N \rightarrow N^+ + N_2$                     | $7.20 \times 10^{-13} (T_{eFFN2}/300.0)$                                            | 1 |
| R574 | $N_2^+ + O_2 \rightarrow O_2^+ + N_2$                 | $6.00 \times 10^{-11} (300.0/T_{eFFN2})^{0.5}$                                      | 1 |
| R575 | $O_4^{++} + N_2 \rightarrow O_2^+ N_2 + O_2$          | $4.60 \times 10^{-12} (T_{eFFN4}/300.0)^{2.5} \exp(-2650.0/T_{eFFN4})$              | 1 |
| R576 | $O_4^{++} + O_2 \rightarrow O_2^+ + O_2 + O_2$        | $3.30 \times 10^{-6} (300.0/T_{eFFN4})^4 \exp(-5030.0/T_{eFFN4})$                   | 1 |
| R577 | $O_4^{++} + O_2(A1) \rightarrow O_2^+ + O_2 + O_2$    | $1.00 \times 10^{-10}$                                                              | 1 |

|      |                                          |                                                                                                       |   |
|------|------------------------------------------|-------------------------------------------------------------------------------------------------------|---|
| R578 | $O_4^++O_2(B1)\rightarrow O_2^++O_2+O_2$ | $1.00\times 10^{-10}$                                                                                 | 1 |
| R579 | $O_4^++NO\rightarrow NO^++O_2+O_2$       | $1.00\times 10^{-10}$                                                                                 | 1 |
| R580 | $N+O_2(v_1)\rightarrow O+NO$             | $3.20\times 10^{-12}(T_g/300.0)\exp(-(3150.0-2205.14)/T_g)$                                           | 2 |
| R581 | $N+O_2(v_2)\rightarrow O+NO$             | $3.20\times 10^{-12}(T_g/300.0)\exp(-(3150.0-4410.28)/T_g)$                                           | 2 |
| R582 | $N+O_2(v_3)\rightarrow O+NO$             | $3.20\times 10^{-12}(T_g/300.0)\exp(-(3150.0-6615.42)/T_g)$                                           | 2 |
| R583 | $N+O_2(v_4)\rightarrow O+NO$             | $3.20\times 10^{-12}(T_g/300.0)\exp(-(3150.0-8704.5)/T_g)$                                            | 2 |
| R584 | $O+N_2(v_1)\rightarrow N+NO$             | $3.00\times 10^{-10}\exp(-(38370.0-3380)/T_g)$                                                        | 2 |
| R585 | $O+N_2(v_2)\rightarrow N+NO$             | $3.00\times 10^{-10}\exp(-(38370.0-6850)/T_g)$                                                        | 2 |
| R586 | $O+N_2(v_3)\rightarrow N+NO$             | $3.00\times 10^{-10}\exp(-(38370.0-10200)/T_g)$                                                       | 2 |
| R587 | $O+N_2(v_4)\rightarrow N+NO$             | $3.00\times 10^{-10}\exp(-(38370.0-13600)/T_g)$                                                       | 2 |
| R588 | $O+N_2(v_5)\rightarrow N+NO$             | $3.00\times 10^{-10}\exp(-(38370.0-17100)/T_g)$                                                       | 2 |
| R589 | $O+N_2(v_6)\rightarrow N+NO$             | $3.00\times 10^{-10}\exp(-(38370.0-20400)/T_g)$                                                       | 2 |
| R590 | $O+N_2(v_7)\rightarrow N+NO$             | $3.00\times 10^{-10}\exp(-(38370.0-23908)/T_g)$                                                       | 2 |
| R591 | $O+N_2(v_8)\rightarrow N+NO$             | $3.00\times 10^{-10}\exp(-(38370.0-27274)/T_g)$                                                       | 2 |
| R592 | $N_2(v_1)+N_2\rightarrow N_2+N_2(v_1)$   | $1.09\times 10^{-13}(T_g/300.0)^{1.5}$                                                                | 3 |
| R593 | $O_2(v_1)+O_2\rightarrow O_2+O_2(v_1)$   | $2.00\times 10^{-14}(T_g/300.0)^{1.04}$                                                               | 3 |
| R594 | $O_2(v_1)+N_2\rightarrow O_2+N_2(v_1)$   | $3.69\times 10^{-12}(T_g/300.0)\exp(-104/T_g^{(1.0/3.0)})$                                            | 3 |
| R595 | $N_2(v_1)+N_2\rightarrow N_2+N_2$        | $7.80\times 10^{-12}T_g\exp(-218.0/T_g^{(1.0/3.0)}+690.0/T_g)/(1.0-\exp(-3365.7/T_g))$                | 3 |
| R596 | $N_2+N_2\rightarrow N_2(v_1)+N_2$        | $7.80\times 10^{-12}T_g\exp(-218.0/T_g^{(1.0/3.0)}+690.0/T_g)/(1.0-\exp(-3365.7/T_g))\exp(-3365/T_g)$ | 3 |
| R597 | $N_2(v_1)+N\rightarrow N_2+N$            | $4.00\times 10^{-16}(T_g/300.0)^{0.5}$                                                                | 3 |
| R598 | $N_2+N\rightarrow N_2(v_1)+N$            | $4.00\times 10^{-16}(T_g/300.0)^{0.5}\exp(-3365/T_g)$                                                 | 3 |
| R599 | $N_2(v_1)+O\rightarrow N_2+O$            | $1.20\times 10^{-13}\exp(-27.6/T_g^{(1.0/3.0)})$                                                      | 3 |
| R600 | $N_2+O\rightarrow N_2(v_1)+O$            | $1.20\times 10^{-13}\exp(-27.6/T_g^{(1.0/3.0)})\exp(-3365/T_g)$                                       | 3 |
| R601 | $O_2(v_1)+O_2\rightarrow O_2+O_2$        | $1.35\times 10^{-12}T_g\exp(-137.9/T_g^{(1.0/3.0)})/(1.0-\exp(-2205.1/T_g))$                          | 3 |
| R602 | $O_2+O_2\rightarrow O_2(v_1)+O_2$        | $1.35\times 10^{-12}T_g\exp(-137.9/T_g^{(1.0/3.0)})\exp(-2205/T_g)/(1.0-\exp(2205.1/T_g))$            | 3 |
| R603 | $O_2(v_1)+O\rightarrow O_2+O$            | $4.50\times 10^{-15}T_g$                                                                              | 3 |
| R604 | $O_2+O\rightarrow O_2(v_1)+O$            | $4.50\times 10^{-15}T_g\exp(-2205/T_g)$                                                               | 3 |

$dT_{ION}=6.0\times 1.3807\times 10^{-16}\times 1.6605\times 10^{-24}(1.0\times 10^{-17}EN)^2$ , EN is reduced electric field

$$T_{\text{IONN}}=T_{\text{g}}+(dT_{\text{ION}}\times 14.0\times 8.0\times 10^{19})^2$$

$$T_{\text{IONN2}}=T_{\text{g}}+(dT_{\text{ION}}\times 28.0\times 4.1\times 10^{19})^2$$

$$T_{\text{IONN3}}=T_{\text{g}}+(dT_{\text{ION}}\times 42.0\times 6.1\times 10^{19})^2$$

$$T_{\text{IONN4}}=T_{\text{g}}+(dT_{\text{ION}}\times 56.0\times 7.0\times 10^{19})^2$$

$$T_{\text{eFFN}}=(T_{\text{IONN}}+0.5T_{\text{g}})/1.5$$

$$T_{\text{eFFN2}}=(T_{\text{IONN2}}+1.0T_{\text{g}})/2.0$$

$$T_{\text{eFFN3}}=(T_{\text{IONN3}}+1.5T_{\text{g}})/2.5$$

$$T_{\text{eFFN4}}=(T_{\text{IONN4}}+2.0T_{\text{g}})/3.0$$

1.S. Pancheshnyi, B. Eismann, G. Hagelaar, L. C. Pitchford, *Computer code ZDPlasKin*, [www.zdplaskin.laplace.univ-tlse.fr](http://www.zdplaskin.laplace.univ-tlse.fr), 2020.

2.A. Fridman, *Plasma Chemistry*, Cambridge University Press, Cambridge, 2008.

3.M. Capitelli, C. M. Ferreira and B. F. Gordiets, *Plasma kinetics in atmospheric gases*, Springer Series on Atomic, Optical, and Plasma Physics, 2000.
